# Supplementary material for: Optimization Analysis of the Position of Thermometers Buried in Concrete Pouring Block Embedded with Cooling Pipes
Source: Hindawi journal article supplement (doi:10.1155/2019/5256839), 2019-01-01
Supplement: f1 [file 5256839.f1.xlsx]

## Sheet: Average-temperature in Fig.5
	Four water-pipe spacings
	1.0 m × 1.0 m	1.5 m × 1.5 m	1.0 m × 1.5 m	2.0 m × 1.5 m
Time/day	Temperature/℃
1.1	17.08	17.1983	17.151	17.2219
1.2	17.4451	17.6639	17.5764	17.7077
1.3	17.7985	18.115	17.9884	18.1783
1.4	18.1334	18.5487	18.3826	18.6317
1.5	18.4489	18.9648	18.7584	19.068
1.6	18.7448	19.3635	19.116	19.4874
1.7	19.0215	19.7451	19.4555	19.8903
1.8	19.2793	20.1102	19.7776	20.2771
1.9	19.5191	20.459	20.0826	20.6482
2	19.7413	20.7922	20.3711	21.0042
2.1	19.9467	21.1102	20.6437	21.3455		`
2.2	20.1359	21.4134	20.9008	21.6725
2.3	20.3097	21.7023	21.1431	21.9857
2.4	20.4685	21.9774	21.371	22.2855
2.5	20.6132	22.2392	21.585	22.5724
2.6	20.7442	22.488	21.7857	22.8467
2.7	20.8622	22.7244	21.9735	23.109
2.8	20.9678	22.9486	22.1489	23.3594
2.9	21.0615	23.1612	22.3124	23.5986
3	21.1438	23.3625	22.4644	23.8267
3.1	21.2153	23.5529	22.6052	24.0442
3.2	21.2764	23.7328	22.7355	24.2515
3.3	21.3277	23.9025	22.8555	24.4488
3.4	21.3696	24.0624	22.9656	24.6364
3.5	21.4024	24.2128	23.0662	24.8148
3.6	21.4268	24.354	23.1577	24.9842
3.7	21.443	24.4864	23.2404	25.1449
3.8	21.4515	24.6103	23.3147	25.2972
3.9	21.4527	24.7259	23.3809	25.4414
4	21.4468	24.8336	23.4393	25.5777
4.1	21.4344	24.9336	23.4903	25.7065
4.2	21.4156	25.0263	23.5341	25.8278
4.3	21.3909	25.1118	23.571	25.9421
4.4	21.3605	25.1904	23.6013	26.0496
4.5	21.3247	25.2624	23.6252	26.1504
4.6	21.2839	25.328	23.6431	26.2448
4.7	21.2383	25.3874	23.6552	26.3331
4.8	21.1882	25.4409	23.6617	26.4153
4.9	21.1338	25.4886	23.6628	26.4918
5	21.0753	25.5308	23.6588	26.5627
5.1	21.0131	25.5677	23.65	26.6283
5.2	20.9474	25.5995	23.6364	26.6886
5.3	20.8782	25.6264	23.6184	26.7439
5.4	20.806	25.6485	23.596	26.7944
5.5	20.7308	25.666	23.5696	26.8402
5.6	20.6529	25.6791	23.5393	26.8814
5.7	20.5724	25.688	23.5052	26.9183
5.8	20.4895	25.6928	23.4676	26.951
5.9	20.4044	25.6937	23.4266	26.9797
6	20.3173	25.6908	23.3824	27.0044
6.1	20.2282	25.6844	23.335	27.0253
6.2	20.1375	25.6744	23.2848	27.0426
6.3	20.0451	25.661	23.2317	27.0564
6.4	19.9512	25.6445	23.176	27.0667
6.5	19.856	25.6249	23.1178	27.0738
6.6	19.7596	25.6023	23.0572	27.0778
6.7	19.662	25.5768	22.9943	27.0787
6.8	19.5635	25.5487	22.9293	27.0767
6.9	19.4642	25.5179	22.8622	27.0718
7	19.364	25.4846	22.7933	27.0643
7.1	19.2632	25.4489	22.7225	27.0541
7.2	19.1618	25.4109	22.65	27.0414
7.3	19.0599	25.3707	22.5759	27.0263
7.4	18.9576	25.3284	22.5003	27.0088
7.5	18.855	25.284	22.4233	26.9891
7.6	18.7521	25.2377	22.3449	26.9672
7.7	18.6491	25.1896	22.2653	26.9432
7.8	18.546	25.1397	22.1846	26.9172
7.9	18.4429	25.0881	22.1027	26.8893
8	18.3397	25.0349	22.0199	26.8596
8.1	18.2367	24.9802	21.9361	26.8281
8.2	18.1338	24.924	21.8515	26.7948
8.3	18.0312	24.8665	21.766	26.7599
8.4	17.9288	24.8076	21.6798	26.7235
8.5	17.8267	24.7474	21.593	26.6855
8.6	17.7249	24.686	21.5056	26.6461
8.7	17.6236	24.6235	21.4176	26.6053
8.8	17.5227	24.56	21.3291	26.5631
8.9	17.4223	24.4954	21.2402	26.5197
9	17.3224	24.4298	21.1509	26.475
9.1	17.223	24.3633	21.0612	26.4292
9.2	17.1242	24.296	20.9713	26.3823
9.3	17.026	24.2278	20.8811	26.3342
9.4	16.9285	24.1589	20.7908	26.2852
9.5	16.8317	24.0892	20.7002	26.2352
9.6	16.7355	24.0189	20.6096	26.1842
9.7	16.6401	23.9479	20.5189	26.1323
9.8	16.5454	23.8764	20.4281	26.0796
9.9	16.4514	23.8043	20.3373	26.0261
10	16.3583	23.7316	20.2466	25.9718
10.1	16.2659	23.6585	20.1559	25.9167
10.2	16.1743	23.585	20.0653	25.861
10.3	16.0836	23.511	19.9748	25.8046
10.4	15.9937	23.4367	19.8845	25.7475
10.5	15.9047	23.3621	19.7944	25.6899
10.6	15.8165	23.2871	19.7044	25.6317
10.7	15.7292	23.2118	19.6147	25.5729
10.8	15.6428	23.1363	19.5252	25.5136
10.9	15.5573	23.0606	19.436	25.4539
11	15.4729	22.9847	19.3473	25.3938
