# Supplementary material for: Optimization Analysis of the Position of Thermometers Buried in Concrete Pouring Block Embedded with Cooling Pipes
Source: Hindawi journal article supplement (doi:10.1155/2019/5256839), 2019-01-01
Supplement: f2 [file 5256839.f2.xlsx]

## Sheet: Coordinate in Fig.7
Four water-pipe spacings
1.0 m × 1.0 m																				1.5 m × 1.5 m																				1.0 m × 1.5 m
Time = day 1.1		Time = day 2.1		Time = day 3.1		Time = day 4.1		Time = day 5.1		Time = day 6.1		Time = day 7.1		Time = day 8.1		Time = day 9.1		Time = day 10.1		Time = day 1.1		Time = day 2.1		Time = day 3.1		Time = day 4.1		Time = day 5.1		Time = day 6.1		Time = day 7.1		Time = day 8.1		Time = day 9.1		Time = day 10.1		Time = day 1.1		Time = day 2.1		Time = day 3.1		Time = day 4.1		Time = day 5.1
x	y	x	y	x	y	x	y	x	y	x	y	x	y	x	y	x	y	x	y	x	y	x	y	x	y	x	y	x	y	x	y	x	y	x	y	x	y	x	y	x	y	x	y	x	y	x	y	x	y
0.104857	-0.217172	0.0123405	-0.308081	0.0456007	-0.308081	0.0528342	-0.308081	0.0567904	-0.308081	0.059185	-0.308081	0.0610822	-0.308081	0.0622802	-0.308081	0.0640257	-0.308081	0.0647139	-0.308081	0.0998411	-0.280303	0.102191	-0.431818	0.112704	-0.44697	0.0688876	-0.462121	0.0853524	-0.462121	0.0940564	-0.462121	0.098917	-0.462121	0.102031	-0.462121	0.104138	-0.462121	0.105859	-0.462121	0.0911043	-0.25	0.0954678	-0.356061	-0.489899	-0.148571	0.5	-0.166684	0.5	-0.178099
0.0959596	-0.219351	0.00505051	-0.308398	0.0454545	-0.308106	0.0454545	-0.309379	0.0555556	-0.308335	0.0555556	-0.308828	0.0555556	-0.309229	0.0555556	-0.309471	0.0555556	-0.309838	0.0555556	-0.309975	0.0984849	-0.28061	0.0984849	-0.432705	0.0984849	-0.450511	0.0681818	-0.462247	0.0833333	-0.462561	0.0833333	-0.464469	0.0984849	-0.462233	0.0984849	-0.46304	0.0984849	-0.463587	0.0984849	-0.464036	0.0858586	-0.25091	0.0858586	-0.358052	-0.496264	-0.143939	0.489899	-0.172885	0.489899	-0.183602
0.0858586	-0.221318	-0.00505051	-0.308398	0.0353535	-0.309563	0.0353535	-0.310836	0.0454545	-0.310102	0.0454545	-0.310591	0.0454545	-0.311006	0.0454545	-0.311236	0.0454545	-0.311606	0.0454545	-0.311735	0.0833333	-0.283231	0.0833333	-0.435785	0.0833333	-0.453676	0.0530303	-0.464399	0.0681818	-0.46529	0.0681818	-0.467182	0.0833333	-0.465563	0.0833333	-0.466378	0.0833333	-0.466921	0.0833333	-0.467353	0.0757576	-0.252285	0.0757576	-0.359899	-0.5	-0.141045	0.487278	-0.174242	0.479798	-0.188088
0.0757576	-0.222839	-0.0123405	-0.308081	0.0252525	-0.310695	0.0252525	-0.311968	0.0353535	-0.311544	0.0353535	-0.31203	0.0353535	-0.312457	0.0353535	-0.312676	0.0353535	-0.313051	0.0353535	-0.313172	0.0681818	-0.285292	0.0681818	-0.438289	0.0681818	-0.45626	0.0378788	-0.466005	0.0530303	-0.467444	0.0530303	-0.469321	0.0681818	-0.468284	0.0681818	-0.469107	0.0681818	-0.469649	0.0681818	-0.470052	0.0656566	-0.253334	0.0656566	-0.361505	-0.5	0.141045	0.479798	-0.177843	0.476364	-0.189394
0.0656566	-0.223981	-0.0151515	-0.307965	0.0151515	-0.311492	0.0151515	-0.312761	0.0252525	-0.312661	0.0252525	-0.313142	0.0252525	-0.31358	0.0252525	-0.313792	0.0252525	-0.314169	0.0252525	-0.314283	0.0530303	-0.287144	0.0530303	-0.440247	0.0530303	-0.458295	0.0227273	-0.467082	0.0378788	-0.469055	0.0378788	-0.470918	0.0530303	-0.470438	0.0530303	-0.471268	0.0530303	-0.471811	0.0530303	-0.472179	0.0555556	-0.254125	0.0555556	-0.362875	-0.496264	0.143939	0.469697	-0.181995	0.469697	-0.191734
0.0555556	-0.224801	-0.0252525	-0.307205	0.00505051	-0.31192	0.00505051	-0.313183	0.0151515	-0.313442	0.0151515	-0.313919	0.0151515	-0.314364	0.0151515	-0.314569	0.0151515	-0.31495	0.0151515	-0.315057	0.0378788	-0.288995	0.0378788	-0.441688	0.0378788	-0.45981	0.00757576	-0.467628	0.0227273	-0.470136	0.0227273	-0.47199	0.0378788	-0.472053	0.0378788	-0.472891	0.0378788	-0.473437	0.0378788	-0.473769	0.0454545	-0.254714	0.0454545	-0.364012	-0.489899	0.148571	0.459596	-0.185722	0.459596	-0.194963
0.0454545	-0.225346	-0.0353535	-0.306139	-0.00505051	-0.31192	-0.00505051	-0.313183	0.00505051	-0.313856	0.00505051	-0.314329	0.00505051	-0.314778	0.00505051	-0.31498	0.00505051	-0.315361	0.00505051	-0.315465	0.0227273	-0.290875	0.0227273	-0.442633	0.0227273	-0.460821	-0.00757576	-0.467628	0.00757576	-0.470685	0.00757576	-0.472534	0.0227273	-0.473142	0.0227273	-0.473988	0.0227273	-0.474537	0.0227273	-0.474837	0.0353535	-0.255146	0.0353535	-0.364919	-0.479798	0.154841	0.449495	-0.189293	0.449495	-0.198083
0.0353535	-0.22566	-0.0454545	-0.304778	-0.0151515	-0.311492	-0.0151515	-0.312761	-0.00505051	-0.313856	-0.00505051	-0.314329	-0.00505051	-0.314778	-0.00505051	-0.31498	-0.00505051	-0.315361	-0.00505051	-0.315465	0.00757576	-0.292468	0.00757576	-0.443101	0.00757576	-0.461329	-0.0227273	-0.467082	-0.00757576	-0.470685	-0.00757576	-0.472534	0.00757576	-0.473698	0.00757576	-0.474548	0.00757576	-0.4751	0.00757576	-0.475381	0.0252525	-0.255453	0.0252525	-0.365595	-0.471963	0.159091	0.449221	-0.189394	0.439394	-0.201292
0.0252525	-0.22579	-0.0555556	-0.303119	-0.0252525	-0.310695	-0.0252525	-0.311968	-0.0151515	-0.313442	-0.0151515	-0.313919	-0.0151515	-0.314364	-0.0151515	-0.314569	-0.0151515	-0.31495	-0.0151515	-0.315057	-0.00757576	-0.292468	-0.00757576	-0.443101	-0.00757576	-0.461329	-0.0378788	-0.466005	-0.0227273	-0.470136	-0.0227273	-0.47199	-0.00757576	-0.473698	-0.00757576	-0.474548	-0.00757576	-0.4751	-0.00757576	-0.475381	0.0151515	-0.255654	0.0151515	-0.366045	-0.469697	0.160236	0.439394	-0.192777	0.429947	-0.204545
0.0151515	-0.225798	-0.0656566	-0.301152	-0.0353535	-0.309563	-0.0353535	-0.310836	-0.0252525	-0.312661	-0.0252525	-0.313142	-0.0252525	-0.31358	-0.0252525	-0.313792	-0.0252525	-0.314169	-0.0252525	-0.314283	-0.0227273	-0.290875	-0.0227273	-0.442633	-0.0227273	-0.460821	-0.0530303	-0.464399	-0.0378788	-0.469055	-0.0378788	-0.470918	-0.0227273	-0.473142	-0.0227273	-0.473988	-0.0227273	-0.474537	-0.0227273	-0.474837	0.00505051	-0.255756	0.00505051	-0.366268	-0.459596	0.164903	0.429293	-0.196542	0.429293	-0.20476
0.00505051	-0.225763	-0.0757576	-0.298856	-0.0454545	-0.308106	-0.0454545	-0.309379	-0.0353535	-0.311544	-0.0353535	-0.31203	-0.0353535	-0.312457	-0.0353535	-0.312676	-0.0353535	-0.313051	-0.0353535	-0.313172	-0.0378788	-0.288995	-0.0378788	-0.441688	-0.0378788	-0.45981	-0.0681818	-0.462247	-0.0530303	-0.467444	-0.0530303	-0.469321	-0.0378788	-0.472053	-0.0378788	-0.472891	-0.0378788	-0.473437	-0.0378788	-0.473769	-0.00505051	-0.255756	-0.00505051	-0.366268	-0.449495	0.169378	0.419192	-0.200758	0.419192	-0.208576
-0.00505051	-0.225763	-0.0791319	-0.29798	-0.0456007	-0.308081	-0.0528342	-0.308081	-0.0454545	-0.310102	-0.0454545	-0.310591	-0.0454545	-0.311006	-0.0454545	-0.311236	-0.0454545	-0.311606	-0.0454545	-0.311735	-0.0530303	-0.287144	-0.0530303	-0.440247	-0.0530303	-0.458295	-0.0688876	-0.462121	-0.0681818	-0.46529	-0.0681818	-0.467182	-0.0530303	-0.470438	-0.0530303	-0.471268	-0.0530303	-0.471811	-0.0530303	-0.472179	-0.0151515	-0.255654	-0.0151515	-0.366045	-0.439394	0.173947	0.411282	-0.204545	0.409091	-0.213038
-0.0151515	-0.225798	-0.0858586	-0.296302	-0.0555556	-0.30643	-0.0555556	-0.307625	-0.0555556	-0.308335	-0.0555556	-0.308828	-0.0555556	-0.309229	-0.0555556	-0.309471	-0.0555556	-0.309838	-0.0555556	-0.309975	-0.0681818	-0.285292	-0.0681818	-0.438289	-0.0681818	-0.45626	-0.0833333	-0.459682	-0.0833333	-0.462561	-0.0833333	-0.464469	-0.0681818	-0.468284	-0.0681818	-0.469107	-0.0681818	-0.469649	-0.0681818	-0.470052	-0.0252525	-0.255453	-0.0252525	-0.365595	-0.438799	0.174242	0.409091	-0.20556	0.39899	-0.218315
-0.0252525	-0.22579	-0.0959596	-0.293404	-0.0656566	-0.304444	-0.0656566	-0.305634	-0.0567904	-0.308081	-0.059185	-0.308081	-0.0610822	-0.308081	-0.0622802	-0.308081	-0.0640257	-0.308081	-0.0647139	-0.308081	-0.0833333	-0.283231	-0.0833333	-0.435785	-0.0833333	-0.453676	-0.0984849	-0.456546	-0.0853524	-0.462121	-0.0940564	-0.462121	-0.0833333	-0.465563	-0.0833333	-0.466378	-0.0833333	-0.466921	-0.0833333	-0.467353	-0.0353535	-0.255146	-0.0353535	-0.364919	-0.429293	0.17858	0.39899	-0.211154	0.396732	-0.219697
-0.0353535	-0.22566	-0.106061	-0.290039	-0.0757576	-0.302127	-0.0757576	-0.303312	-0.0656566	-0.306342	-0.0656566	-0.306809	-0.0656566	-0.307173	-0.0656566	-0.307415	-0.0656566	-0.307758	-0.0656566	-0.307895	-0.0984849	-0.28061	-0.0984849	-0.432705	-0.0984849	-0.450511	-0.113636	-0.4528	-0.0984849	-0.459394	-0.0984849	-0.461196	-0.0984849	-0.462233	-0.0984849	-0.46304	-0.0984849	-0.463587	-0.0984849	-0.464036	-0.0454545	-0.254714	-0.0454545	-0.364012	-0.419192	0.183684	0.388889	-0.21761	0.388889	-0.224206
-0.0454545	-0.225346	-0.111796	-0.287879	-0.0858586	-0.299454	-0.0858586	-0.300634	-0.0757576	-0.304032	-0.0757576	-0.304502	-0.0757576	-0.304852	-0.0757576	-0.305108	-0.0757576	-0.305448	-0.0757576	-0.305592	-0.0998411	-0.280303	-0.102191	-0.431818	-0.112704	-0.44697	-0.128788	-0.448421	-0.113636	-0.455642	-0.113636	-0.457452	-0.098917	-0.462121	-0.102031	-0.462121	-0.104138	-0.462121	-0.105859	-0.462121	-0.0555556	-0.254125	-0.0555556	-0.362875	-0.40914	0.189394	0.385955	-0.219697	0.378788	-0.2306
-0.0555556	-0.224801	-0.116162	-0.286284	-0.0907584	-0.29798	-0.094605	-0.29798	-0.0858586	-0.301365	-0.0858586	-0.301837	-0.0858586	-0.302173	-0.0858586	-0.302446	-0.0858586	-0.302784	-0.0858586	-0.302933	-0.113636	-0.277689	-0.113636	-0.429217	-0.113636	-0.446748	-0.133221	-0.44697	-0.128788	-0.451257	-0.128788	-0.453072	-0.113636	-0.458492	-0.113636	-0.459244	-0.113636	-0.459764	-0.113636	-0.460189	-0.0656566	-0.253334	-0.0656566	-0.361505	-0.409091	0.18942	0.378788	-0.224478	0.372531	-0.234848
-0.0656566	-0.223981	-0.126263	-0.282178	-0.0959596	-0.296467	-0.0959596	-0.297582	-0.0959596	-0.298301	-0.0959596	-0.298773	-0.0959596	-0.299096	-0.0959596	-0.299389	-0.0959596	-0.299724	-0.0959596	-0.299877	-0.128788	-0.273876	-0.128788	-0.425184	-0.128788	-0.442607	-0.143939	-0.443591	-0.141704	-0.44697	-0.143939	-0.448029	-0.128788	-0.45413	-0.128788	-0.454876	-0.128788	-0.455403	-0.128788	-0.455819	-0.0757576	-0.252285	-0.0757576	-0.359899	-0.39899	0.195823	0.368687	-0.231661	0.368687	-0.237299
-0.0757576	-0.222839	-0.135926	-0.277778	-0.106061	-0.293098	-0.106061	-0.294212	-0.0968936	-0.29798	-0.0982588	-0.29798	-0.0991828	-0.29798	-0.100045	-0.29798	-0.100998	-0.29798	-0.101438	-0.29798	-0.143939	-0.268882	-0.143939	-0.420489	-0.143939	-0.437822	-0.159091	-0.438167	-0.143939	-0.446255	-0.146793	-0.44697	-0.143939	-0.449115	-0.143939	-0.449855	-0.143939	-0.450391	-0.143939	-0.450792	-0.0858586	-0.25091	-0.0858586	-0.358052	-0.388889	0.203219	0.364436	-0.234848	0.358586	-0.244139
-0.0858586	-0.221318	-0.136364	-0.277583	-0.116162	-0.289253	-0.116162	-0.290369	-0.106061	-0.29492	-0.106061	-0.295365	-0.106061	-0.295665	-0.106061	-0.295963	-0.106061	-0.296274	-0.106061	-0.296423	-0.152914	-0.265152	-0.154728	-0.416667	-0.159091	-0.432343	-0.174242	-0.432006	-0.159091	-0.440835	-0.159091	-0.44255	-0.149719	-0.44697	-0.151682	-0.44697	-0.153113	-0.44697	-0.15414	-0.44697	-0.0911043	-0.25	-0.0954678	-0.356061	-0.387284	0.204545	0.358586	-0.238973	0.350166	-0.25
-0.0959596	-0.219351	-0.146465	-0.272691	-0.119434	-0.287879	-0.122054	-0.287879	-0.116162	-0.291079	-0.116162	-0.291519	-0.116162	-0.291814	-0.116162	-0.292132	-0.116162	-0.292432	-0.116162	-0.292581	-0.159091	-0.262801	-0.159091	-0.415177	-0.160405	-0.431818	-0.174665	-0.431818	-0.174242	-0.43469	-0.174242	-0.436408	-0.159091	-0.443602	-0.159091	-0.444297	-0.159091	-0.444811	-0.159091	-0.445173	-0.0959596	-0.249314	-0.0959596	-0.355964	-0.378788	0.211242	0.348485	-0.246343	0.348485	-0.251111
-0.104857	-0.217172	-0.15573	-0.267677	-0.126263	-0.285083	-0.126263	-0.286145	-0.123701	-0.287879	-0.124704	-0.287879	-0.125375	-0.287879	-0.126151	-0.287879	-0.126263	-0.28812	-0.126263	-0.288269	-0.174242	-0.25546	-0.174242	-0.409379	-0.174242	-0.426449	-0.189394	-0.425421	-0.180641	-0.431818	-0.184395	-0.431818	-0.174242	-0.437489	-0.174242	-0.43818	-0.174242	-0.438703	-0.174242	-0.43905	-0.106061	-0.247509	-0.106061	-0.353767	-0.368687	0.219603	0.343583	-0.25	0.338384	-0.258044
-0.106061	-0.216901	-0.156566	-0.267229	-0.136364	-0.280495	-0.136364	-0.281564	-0.126263	-0.286819	-0.126263	-0.287231	-0.126263	-0.287509	-0.126263	-0.287832	-0.126783	-0.287879	-0.127105	-0.287879	-0.183074	-0.25	-0.189394	-0.402757	-0.189394	-0.419804	-0.204545	-0.418018	-0.189394	-0.427983	-0.189394	-0.429611	-0.186775	-0.431818	-0.188249	-0.431818	-0.189388	-0.431818	-0.189394	-0.432152	-0.116162	-0.24522	-0.116162	-0.351314	-0.368581	0.219697	0.338384	-0.253689	0.328283	-0.264947
-0.116162	-0.214156	-0.166667	-0.261363	-0.141809	-0.277778	-0.143912	-0.277778	-0.136364	-0.282236	-0.136364	-0.282642	-0.136364	-0.282921	-0.136364	-0.283266	-0.136364	-0.283532	-0.136364	-0.283674	-0.189394	-0.246131	-0.191999	-0.401515	-0.195881	-0.416667	-0.207096	-0.416667	-0.204545	-0.42063	-0.204545	-0.422264	-0.189394	-0.43066	-0.189394	-0.43131	-0.189394	-0.431816	-0.190071	-0.431818	-0.126263	-0.24235	-0.126263	-0.348593	-0.358586	0.227953	0.328283	-0.260938	0.327989	-0.265152
-0.126263	-0.210676	-0.172582	-0.257576	-0.146465	-0.275491	-0.146465	-0.276517	-0.145213	-0.277778	-0.145985	-0.277778	-0.146465	-0.277808	-0.146465	-0.278177	-0.146465	-0.278438	-0.146465	-0.278579	-0.204139	-0.234848	-0.204545	-0.395671	-0.204545	-0.412558	-0.219697	-0.41009	-0.211999	-0.416667	-0.215013	-0.416667	-0.204545	-0.423333	-0.204545	-0.423981	-0.204545	-0.424495	-0.204545	-0.424813	-0.136364	-0.238773	-0.136364	-0.345589	-0.350371	0.234848	0.322388	-0.265152	0.318182	-0.271713
-0.134623	-0.207071	-0.176768	-0.25488	-0.156566	-0.270046	-0.156566	-0.271087	-0.146465	-0.277157	-0.146465	-0.277539	-0.146521	-0.277778	-0.147202	-0.277778	-0.147681	-0.277778	-0.147939	-0.277778	-0.204545	-0.234524	-0.219697	-0.387762	-0.219697	-0.404619	-0.234481	-0.401515	-0.219697	-0.412637	-0.219697	-0.4142	-0.216968	-0.416667	-0.218141	-0.416667	-0.219074	-0.416667	-0.219664	-0.416667	-0.145363	-0.234848	-0.146465	-0.342288	-0.348485	0.236337	0.318182	-0.268045	0.308081	-0.278314
-0.136364	-0.206346	-0.186869	-0.247747	-0.160599	-0.267677	-0.162348	-0.267677	-0.156566	-0.271726	-0.156566	-0.272104	-0.156566	-0.272377	-0.156566	-0.272752	-0.156566	-0.272999	-0.156566	-0.273133	-0.219697	-0.220783	-0.222169	-0.386364	-0.22513	-0.401515	-0.234848	-0.401303	-0.234848	-0.403939	-0.234848	-0.405525	-0.219697	-0.415224	-0.219697	-0.415842	-0.219697	-0.416336	-0.219697	-0.416649	-0.146465	-0.234421	-0.150382	-0.340909	-0.338384	0.244553	0.308081	-0.274953	0.305002	-0.280303
-0.146465	-0.201307	-0.18723	-0.247475	-0.166667	-0.264122	-0.166667	-0.265137	-0.1634	-0.267677	-0.16402	-0.267677	-0.164473	-0.267677	-0.165117	-0.267677	-0.165522	-0.267677	-0.16574	-0.267677	-0.220783	-0.219697	-0.234848	-0.379236	-0.234848	-0.396009	-0.25	-0.391935	-0.238757	-0.401515	-0.241289	-0.401515	-0.234848	-0.406548	-0.234848	-0.407176	-0.234848	-0.407674	-0.234848	-0.40801	-0.156566	-0.229827	-0.156566	-0.338807	-0.331672	0.25	0.300018	-0.280303	0.29798	-0.284705
-0.153512	-0.19697	-0.19697	-0.239983	-0.176768	-0.257593	-0.176768	-0.258636	-0.166667	-0.265746	-0.166667	-0.266108	-0.166667	-0.266376	-0.166667	-0.266759	-0.166667	-0.266998	-0.166667	-0.267127	-0.234524	-0.204545	-0.24763	-0.371212	-0.25	-0.386519	-0.258243	-0.386364	-0.25	-0.394565	-0.25	-0.396109	-0.242891	-0.401515	-0.243884	-0.401515	-0.244664	-0.401515	-0.245215	-0.401515	-0.166667	-0.224063	-0.166667	-0.335092	-0.328283	0.252618	0.29798	-0.281614	0.287879	-0.290835
-0.156566	-0.195059	-0.200118	-0.237374	-0.176793	-0.257576	-0.178301	-0.257576	-0.176768	-0.259245	-0.176768	-0.259611	-0.176768	-0.259887	-0.176768	-0.260293	-0.176768	-0.26054	-0.176768	-0.260671	-0.234848	-0.204139	-0.25	-0.369717	-0.250233	-0.386364	-0.265152	-0.381672	-0.262128	-0.386364	-0.264368	-0.386364	-0.25	-0.39708	-0.25	-0.397697	-0.25	-0.398178	-0.25	-0.398527	-0.173043	-0.219697	-0.176768	-0.331041	-0.318182	0.260442	0.287879	-0.288007	0.27995	-0.295455
-0.166667	-0.187546	-0.207071	-0.231424	-0.186869	-0.250551	-0.186869	-0.251586	-0.179172	-0.257576	-0.179696	-0.257576	-0.180092	-0.257576	-0.180677	-0.257576	-0.181033	-0.257576	-0.181219	-0.257576	-0.246131	-0.189394	-0.265152	-0.35936	-0.265152	-0.376354	-0.279361	-0.371212	-0.265152	-0.384307	-0.265152	-0.385829	-0.265152	-0.386773	-0.265152	-0.387416	-0.265152	-0.387907	-0.265152	-0.388287	-0.176768	-0.217247	-0.186869	-0.326637	-0.311984	0.265152	0.277778	-0.294084	0.277778	-0.29669
-0.167475	-0.186869	-0.211626	-0.227273	-0.190928	-0.247475	-0.192284	-0.247475	-0.186869	-0.252173	-0.186869	-0.252532	-0.186869	-0.252809	-0.186869	-0.253221	-0.186869	-0.253471	-0.186869	-0.253601	-0.25	-0.183074	-0.269603	-0.356061	-0.272201	-0.371212	-0.280303	-0.370509	-0.280303	-0.373233	-0.280303	-0.374807	-0.265719	-0.386364	-0.266608	-0.386364	-0.267286	-0.386364	-0.267814	-0.386364	-0.186869	-0.209433	-0.188779	-0.325758	-0.308081	0.268008	0.275443	-0.295455	0.267677	-0.302322
-0.176768	-0.17853	-0.217172	-0.222005	-0.19697	-0.2428	-0.19697	-0.243843	-0.193035	-0.247475	-0.193502	-0.247475	-0.193862	-0.247475	-0.194401	-0.247475	-0.194734	-0.247475	-0.194902	-0.247475	-0.25546	-0.174242	-0.280303	-0.347959	-0.280303	-0.365217	-0.295455	-0.358492	-0.282898	-0.371212	-0.28491	-0.371212	-0.280303	-0.375734	-0.280303	-0.376386	-0.280303	-0.376874	-0.280303	-0.377264	-0.192252	-0.204545	-0.19697	-0.322054	-0.29798	0.275274	0.267677	-0.299913	0.257576	-0.307683
-0.17853	-0.176768	-0.222005	-0.217172	-0.203488	-0.237374	-0.204733	-0.237374	-0.19697	-0.244414	-0.19697	-0.244775	-0.19697	-0.245054	-0.19697	-0.245474	-0.19697	-0.245734	-0.19697	-0.245864	-0.262801	-0.159091	-0.28891	-0.340909	-0.291797	-0.356061	-0.298338	-0.356061	-0.295455	-0.36125	-0.295455	-0.362834	-0.286079	-0.371212	-0.286917	-0.371212	-0.287539	-0.371212	-0.288037	-0.371212	-0.19697	-0.20021	-0.207071	-0.317122	-0.290707	0.280303	0.257576	-0.30547	0.251851	-0.310606
-0.186869	-0.167475	-0.227273	-0.211626	-0.207071	-0.234298	-0.207071	-0.235365	-0.205397	-0.237374	-0.205824	-0.237374	-0.206156	-0.237374	-0.206655	-0.237374	-0.206971	-0.237374	-0.207071	-0.237424	-0.265152	-0.152914	-0.295455	-0.335371	-0.295455	-0.353074	-0.310606	-0.345424	-0.301588	-0.356061	-0.303451	-0.356061	-0.295455	-0.363739	-0.295455	-0.364413	-0.295455	-0.364909	-0.295455	-0.365303	-0.207071	-0.189536	-0.217172	-0.311774	-0.287879	0.282199	0.247725	-0.310606	0.247475	-0.312817
-0.187546	-0.166667	-0.231424	-0.207071	-0.214765	-0.227273	-0.215929	-0.227273	-0.207071	-0.235931	-0.207071	-0.236299	-0.207071	-0.236585	-0.207071	-0.237016	-0.207071	-0.237288	-0.207128	-0.237374	-0.268882	-0.143939	-0.306078	-0.325758	-0.309415	-0.340909	-0.315526	-0.340909	-0.310606	-0.348215	-0.310606	-0.349832	-0.3045	-0.356061	-0.305304	-0.356061	-0.305892	-0.356061	-0.306349	-0.356061	-0.207197	-0.189394	-0.219277	-0.310606	-0.277778	0.288797	0.247475	-0.310735	0.237374	-0.317744
-0.195059	-0.156566	-0.237374	-0.200118	-0.217172	-0.224984	-0.217172	-0.22609	-0.216536	-0.227273	-0.216936	-0.227273	-0.217172	-0.227346	-0.217172	-0.227801	-0.217172	-0.228094	-0.217172	-0.228236	-0.273876	-0.128788	-0.310606	-0.321476	-0.310606	-0.339834	-0.325758	-0.331157	-0.31855	-0.340909	-0.320303	-0.340909	-0.310606	-0.350734	-0.310606	-0.35144	-0.310606	-0.351954	-0.310606	-0.352349	-0.217172	-0.177108	-0.227273	-0.306177	-0.267677	0.29503	0.237374	-0.315831	0.227273	-0.322399
-0.19697	-0.153512	-0.239983	-0.19697	-0.224984	-0.217172	-0.22609	-0.217172	-0.217172	-0.226667	-0.217172	-0.227048	-0.217248	-0.227273	-0.217723	-0.227273	-0.218029	-0.227273	-0.218177	-0.227273	-0.277689	-0.113636	-0.321476	-0.310606	-0.325348	-0.325758	-0.331157	-0.325758	-0.325758	-0.334029	-0.325758	-0.335701	-0.321272	-0.340909	-0.322046	-0.340909	-0.322608	-0.340909	-0.32303	-0.340909	-0.219287	-0.174242	-0.237374	-0.300173	-0.266972	0.295455	0.227273	-0.320641	0.219584	-0.325758
-0.201307	-0.146465	-0.247475	-0.18723	-0.227273	-0.214765	-0.227273	-0.215929	-0.226667	-0.217172	-0.227048	-0.217172	-0.227273	-0.217248	-0.227273	-0.217723	-0.227273	-0.218029	-0.227273	-0.218177	-0.280303	-0.0998411	-0.325758	-0.306078	-0.325758	-0.325348	-0.340909	-0.315526	-0.334029	-0.325758	-0.335701	-0.325758	-0.325758	-0.336623	-0.325758	-0.337364	-0.325758	-0.337902	-0.325758	-0.338304	-0.227273	-0.161464	-0.244818	-0.295455	-0.257576	0.30101	0.217172	-0.325163	0.217172	-0.326813
-0.206346	-0.136364	-0.247747	-0.186869	-0.234298	-0.207071	-0.235365	-0.207071	-0.227273	-0.216536	-0.227273	-0.216936	-0.227346	-0.217172	-0.227801	-0.217172	-0.228094	-0.217172	-0.228236	-0.217172	-0.28061	-0.0984849	-0.335371	-0.295455	-0.339834	-0.310606	-0.345424	-0.310606	-0.340909	-0.31855	-0.340909	-0.320303	-0.336623	-0.325758	-0.337364	-0.325758	-0.337902	-0.325758	-0.338304	-0.325758	-0.228683	-0.159091	-0.247475	-0.293752	-0.247475	0.306662	0.215791	-0.325758	0.207071	-0.331069
-0.207071	-0.134623	-0.25488	-0.176768	-0.237374	-0.203488	-0.237374	-0.204733	-0.235931	-0.207071	-0.236299	-0.207071	-0.236585	-0.207071	-0.237016	-0.207071	-0.237288	-0.207071	-0.237374	-0.207128	-0.283231	-0.0833333	-0.340909	-0.28891	-0.340909	-0.309415	-0.356061	-0.298338	-0.348215	-0.310606	-0.349832	-0.310606	-0.340909	-0.321272	-0.340909	-0.322046	-0.340909	-0.322608	-0.340909	-0.32303	-0.236035	-0.143939	-0.257576	-0.286983	-0.240047	0.310606	0.207071	-0.329534	0.19697	-0.335064
-0.210676	-0.126263	-0.257576	-0.172582	-0.2428	-0.19697	-0.243843	-0.19697	-0.237374	-0.205397	-0.237374	-0.205824	-0.237374	-0.206156	-0.237374	-0.206655	-0.237374	-0.206971	-0.237424	-0.207071	-0.285292	-0.0681818	-0.347959	-0.280303	-0.353074	-0.295455	-0.358492	-0.295455	-0.356061	-0.301588	-0.356061	-0.303451	-0.350734	-0.310606	-0.35144	-0.310606	-0.351954	-0.310606	-0.352349	-0.310606	-0.237374	-0.14037	-0.266863	-0.280303	-0.237374	0.312015	0.19697	-0.333651	0.186869	-0.338803
-0.214156	-0.116162	-0.261363	-0.166667	-0.247475	-0.190928	-0.247475	-0.192284	-0.244414	-0.19697	-0.244775	-0.19697	-0.245054	-0.19697	-0.245474	-0.19697	-0.245734	-0.19697	-0.245864	-0.19697	-0.287144	-0.0530303	-0.356061	-0.269603	-0.356061	-0.291797	-0.370509	-0.280303	-0.36125	-0.295455	-0.362834	-0.295455	-0.356061	-0.3045	-0.356061	-0.305304	-0.356061	-0.305892	-0.356061	-0.306349	-0.241832	-0.128788	-0.267677	-0.279703	-0.227273	0.317152	0.186869	-0.337499	0.180836	-0.340909
-0.216901	-0.106061	-0.267229	-0.156566	-0.250551	-0.186869	-0.251586	-0.186869	-0.247475	-0.193035	-0.247475	-0.193502	-0.247475	-0.193862	-0.247475	-0.194401	-0.247475	-0.194734	-0.247475	-0.194902	-0.288995	-0.0378788	-0.35936	-0.265152	-0.365217	-0.280303	-0.371212	-0.279361	-0.371212	-0.282898	-0.371212	-0.28491	-0.363739	-0.295455	-0.364413	-0.295455	-0.364909	-0.295455	-0.365303	-0.295455	-0.246137	-0.113636	-0.277778	-0.272017	-0.217172	0.321967	0.177275	-0.340909	0.176768	-0.342354
-0.217172	-0.104857	-0.267677	-0.15573	-0.257576	-0.176793	-0.257576	-0.178301	-0.252173	-0.186869	-0.252532	-0.186869	-0.252809	-0.186869	-0.253221	-0.186869	-0.253471	-0.186869	-0.253601	-0.186869	-0.290875	-0.0227273	-0.369717	-0.25	-0.371212	-0.272201	-0.381672	-0.265152	-0.373233	-0.280303	-0.374807	-0.280303	-0.371212	-0.286079	-0.371212	-0.286917	-0.371212	-0.287539	-0.371212	-0.288037	-0.247475	-0.107238	-0.286229	-0.265152	-0.208697	0.325758	0.176768	-0.341093	0.166667	-0.345752
-0.219351	-0.0959596	-0.272691	-0.146465	-0.257593	-0.176768	-0.258636	-0.176768	-0.257576	-0.179172	-0.257576	-0.179696	-0.257576	-0.180092	-0.257576	-0.180677	-0.257576	-0.181033	-0.257576	-0.181219	-0.292468	-0.00757576	-0.371212	-0.24763	-0.376354	-0.265152	-0.386364	-0.258243	-0.384307	-0.265152	-0.385829	-0.265152	-0.375734	-0.280303	-0.376386	-0.280303	-0.376874	-0.280303	-0.377264	-0.280303	-0.249472	-0.0984849	-0.287879	-0.263764	-0.207071	0.32649	0.166667	-0.344581	0.156566	-0.348913
-0.221318	-0.0858586	-0.277583	-0.136364	-0.264122	-0.166667	-0.265137	-0.166667	-0.259245	-0.176768	-0.259611	-0.176768	-0.259887	-0.176768	-0.260293	-0.176768	-0.26054	-0.176768	-0.260671	-0.176768	-0.292468	0.00757576	-0.379236	-0.234848	-0.386364	-0.250233	-0.391935	-0.25	-0.386364	-0.262128	-0.386364	-0.264368	-0.386364	-0.265719	-0.386364	-0.266608	-0.386364	-0.267286	-0.386364	-0.267814	-0.251952	-0.0833333	-0.29798	-0.25501	-0.19697	0.330851	0.156566	-0.347821	0.146465	-0.35184
-0.222839	-0.0757576	-0.277778	-0.135926	-0.267677	-0.160599	-0.267677	-0.162348	-0.265746	-0.166667	-0.266108	-0.166667	-0.266376	-0.166667	-0.266759	-0.166667	-0.266998	-0.166667	-0.267127	-0.166667	-0.290875	0.0227273	-0.386364	-0.222169	-0.386519	-0.25	-0.401303	-0.234848	-0.394565	-0.25	-0.396109	-0.25	-0.386773	-0.265152	-0.387416	-0.265152	-0.387907	-0.265152	-0.388287	-0.265152	-0.253641	-0.0681818	-0.30352	-0.25	-0.186869	0.334915	0.146465	-0.350817	0.136364	-0.354538
-0.223981	-0.0656566	-0.282178	-0.126263	-0.270046	-0.156566	-0.271087	-0.156566	-0.267677	-0.1634	-0.267677	-0.16402	-0.267677	-0.164473	-0.267677	-0.165117	-0.267677	-0.165522	-0.267677	-0.16574	-0.288995	0.0378788	-0.387762	-0.219697	-0.396009	-0.234848	-0.401515	-0.234481	-0.401515	-0.238757	-0.401515	-0.241289	-0.39708	-0.25	-0.397697	-0.25	-0.398178	-0.25	-0.398527	-0.25	-0.25477	-0.0530303	-0.308081	-0.245685	-0.176768	0.338692	0.136364	-0.353575	0.130188	-0.356061
-0.224801	-0.0555556	-0.286284	-0.116162	-0.275491	-0.146465	-0.276517	-0.146465	-0.271726	-0.156566	-0.272104	-0.156566	-0.272377	-0.156566	-0.272752	-0.156566	-0.272999	-0.156566	-0.273133	-0.156566	-0.287144	0.0530303	-0.395671	-0.204545	-0.401515	-0.22513	-0.41009	-0.219697	-0.403939	-0.234848	-0.405525	-0.234848	-0.401515	-0.242891	-0.401515	-0.243884	-0.401515	-0.244664	-0.401515	-0.245215	-0.255517	-0.0378788	-0.318182	-0.235796	-0.170432	0.340909	0.126429	-0.356061	0.126263	-0.357061
-0.225346	-0.0454545	-0.287879	-0.111796	-0.277778	-0.141809	-0.277778	-0.143912	-0.277157	-0.146465	-0.277539	-0.146465	-0.277778	-0.146521	-0.277778	-0.147202	-0.277778	-0.147681	-0.277778	-0.147939	-0.285292	0.0681818	-0.401515	-0.191999	-0.404619	-0.219697	-0.416667	-0.207096	-0.412637	-0.219697	-0.4142	-0.219697	-0.406548	-0.234848	-0.407176	-0.234848	-0.407674	-0.234848	-0.40801	-0.234848	-0.255995	-0.0227273	-0.319143	-0.234848	-0.166667	0.342257	0.126263	-0.356104	0.116162	-0.359439
-0.22566	-0.0353535	-0.290039	-0.106061	-0.280495	-0.136364	-0.281564	-0.136364	-0.277778	-0.145213	-0.277778	-0.145985	-0.277808	-0.146465	-0.278177	-0.146465	-0.278438	-0.146465	-0.278579	-0.146465	-0.283231	0.0833333	-0.402757	-0.189394	-0.412558	-0.204545	-0.418018	-0.204545	-0.416667	-0.211999	-0.416667	-0.215013	-0.415224	-0.219697	-0.415842	-0.219697	-0.416336	-0.219697	-0.416649	-0.219697	-0.25624	-0.00757576	-0.328283	-0.225277	-0.156566	0.345661	0.116162	-0.358534	0.106061	-0.361596
-0.22579	-0.0252525	-0.293404	-0.0959596	-0.285083	-0.126263	-0.286145	-0.126263	-0.282236	-0.136364	-0.282642	-0.136364	-0.282921	-0.136364	-0.283266	-0.136364	-0.283532	-0.136364	-0.283674	-0.136364	-0.28061	0.0984849	-0.409379	-0.174242	-0.416667	-0.195881	-0.425421	-0.189394	-0.42063	-0.204545	-0.422264	-0.204545	-0.416667	-0.216968	-0.416667	-0.218141	-0.416667	-0.219074	-0.416667	-0.219664	-0.25624	0.00757576	-0.333518	-0.219697	-0.146465	0.348804	0.106061	-0.360739	0.0959596	-0.36354
-0.225798	-0.0151515	-0.296302	-0.0858586	-0.287879	-0.119434	-0.287879	-0.122054	-0.286819	-0.126263	-0.287231	-0.126263	-0.287509	-0.126263	-0.287832	-0.126263	-0.287879	-0.126783	-0.287879	-0.127105	-0.280303	0.0998411	-0.415177	-0.159091	-0.419804	-0.189394	-0.431818	-0.174665	-0.427983	-0.189394	-0.429611	-0.189394	-0.423333	-0.204545	-0.423981	-0.204545	-0.424495	-0.204545	-0.424813	-0.204545	-0.255995	0.0227273	-0.338384	-0.214122	-0.136364	0.351692	0.0959596	-0.362727	0.0858586	-0.365275
-0.225763	-0.00505051	-0.29798	-0.0791319	-0.289253	-0.116162	-0.290369	-0.116162	-0.287879	-0.123701	-0.287879	-0.124704	-0.287879	-0.125375	-0.287879	-0.126151	-0.28812	-0.126263	-0.288269	-0.126263	-0.277689	0.113636	-0.416667	-0.154728	-0.426449	-0.174242	-0.432006	-0.174242	-0.431818	-0.180641	-0.431818	-0.184395	-0.43066	-0.189394	-0.43131	-0.189394	-0.431816	-0.189394	-0.431818	-0.190071	-0.255517	0.0378788	-0.346732	-0.204545	-0.126263	0.354334	0.0858586	-0.364504	0.0757576	-0.366806
-0.225763	0.00505051	-0.298856	-0.0757576	-0.293098	-0.106061	-0.294212	-0.106061	-0.291079	-0.116162	-0.291519	-0.116162	-0.291814	-0.116162	-0.292132	-0.116162	-0.292432	-0.116162	-0.292581	-0.116162	-0.273876	0.128788	-0.420489	-0.143939	-0.431818	-0.160405	-0.438167	-0.159091	-0.43469	-0.174242	-0.436408	-0.174242	-0.431818	-0.186775	-0.431818	-0.188249	-0.431818	-0.189388	-0.432152	-0.189394	-0.25477	0.0530303	-0.348485	-0.20237	-0.119051	0.356061	0.0757576	-0.366075	0.0656566	-0.368137
-0.225798	0.0151515	-0.301152	-0.0656566	-0.296467	-0.0959596	-0.297582	-0.0959596	-0.29492	-0.106061	-0.295365	-0.106061	-0.295665	-0.106061	-0.295963	-0.106061	-0.296274	-0.106061	-0.296423	-0.106061	-0.268882	0.143939	-0.425184	-0.128788	-0.432343	-0.159091	-0.443591	-0.143939	-0.440835	-0.159091	-0.44255	-0.159091	-0.437489	-0.174242	-0.43818	-0.174242	-0.438703	-0.174242	-0.43905	-0.174242	-0.253641	0.0681818	-0.358586	-0.190098	-0.116162	0.356779	0.0656566	-0.367443	0.0555556	-0.369271
-0.22579	0.0252525	-0.303119	-0.0555556	-0.29798	-0.0907584	-0.29798	-0.094605	-0.29798	-0.0968936	-0.29798	-0.0982588	-0.29798	-0.0991828	-0.29798	-0.100045	-0.29798	-0.100998	-0.29798	-0.101438	-0.265152	0.152914	-0.429217	-0.113636	-0.437822	-0.143939	-0.44697	-0.133221	-0.446255	-0.143939	-0.44697	-0.146793	-0.443602	-0.159091	-0.444297	-0.159091	-0.444811	-0.159091	-0.445173	-0.159091	-0.251952	0.0833333	-0.359189	-0.189394	-0.106061	0.359087	0.0555556	-0.36861	0.0454545	-0.370208
-0.22566	0.0353535	-0.304778	-0.0454545	-0.299454	-0.0858586	-0.300634	-0.0858586	-0.298301	-0.0959596	-0.298773	-0.0959596	-0.299096	-0.0959596	-0.299389	-0.0959596	-0.299724	-0.0959596	-0.299877	-0.0959596	-0.262801	0.159091	-0.431818	-0.102191	-0.442607	-0.128788	-0.448421	-0.128788	-0.44697	-0.141704	-0.448029	-0.143939	-0.44697	-0.149719	-0.44697	-0.151682	-0.44697	-0.153113	-0.44697	-0.15414	-0.249472	0.0984849	-0.368687	-0.177432	-0.0959596	0.361165	0.0454545	-0.369578	0.0353535	-0.370952
-0.225346	0.0454545	-0.306139	-0.0353535	-0.302127	-0.0757576	-0.303312	-0.0757576	-0.301365	-0.0858586	-0.301837	-0.0858586	-0.302173	-0.0858586	-0.302446	-0.0858586	-0.302784	-0.0858586	-0.302933	-0.0858586	-0.25546	0.174242	-0.432705	-0.0984849	-0.446748	-0.113636	-0.4528	-0.113636	-0.451257	-0.128788	-0.453072	-0.128788	-0.449115	-0.143939	-0.449855	-0.143939	-0.450391	-0.143939	-0.450792	-0.143939	-0.247475	0.107238	-0.371372	-0.174242	-0.0858586	0.363022	0.0353535	-0.370348	0.0306105	-0.371212
-0.224801	0.0555556	-0.307205	-0.0252525	-0.304444	-0.0656566	-0.305634	-0.0656566	-0.304032	-0.0757576	-0.304502	-0.0757576	-0.304852	-0.0757576	-0.305108	-0.0757576	-0.305448	-0.0757576	-0.305592	-0.0757576	-0.25	0.183074	-0.435785	-0.0833333	-0.44697	-0.112704	-0.456546	-0.0984849	-0.455642	-0.113636	-0.457452	-0.113636	-0.45413	-0.128788	-0.454876	-0.128788	-0.455403	-0.128788	-0.455819	-0.128788	-0.246137	0.113636	-0.378788	-0.164585	-0.0757576	0.364663	0.0252525	-0.370922	0.0252525	-0.371522
-0.223981	0.0656566	-0.307965	-0.0151515	-0.30643	-0.0555556	-0.307625	-0.0555556	-0.306342	-0.0656566	-0.306809	-0.0656566	-0.307173	-0.0656566	-0.307415	-0.0656566	-0.307758	-0.0656566	-0.307895	-0.0656566	-0.246131	0.189394	-0.438289	-0.0681818	-0.450511	-0.0984849	-0.459682	-0.0833333	-0.459394	-0.0984849	-0.461196	-0.0984849	-0.458492	-0.113636	-0.459244	-0.113636	-0.459764	-0.113636	-0.460189	-0.113636	-0.241832	0.128788	-0.383367	-0.159091	-0.0656566	0.366092	0.0175404	-0.371212	0.0151515	-0.371909
-0.222839	0.0757576	-0.308081	-0.0123405	-0.308081	-0.0456007	-0.308081	-0.0528342	-0.308081	-0.0567904	-0.308081	-0.059185	-0.308081	-0.0610822	-0.308081	-0.0622802	-0.308081	-0.0640257	-0.308081	-0.0647139	-0.234848	0.204139	-0.440247	-0.0530303	-0.453676	-0.0833333	-0.462121	-0.0688876	-0.462121	-0.0853524	-0.462121	-0.0940564	-0.462121	-0.098917	-0.462121	-0.102031	-0.462121	-0.104138	-0.462121	-0.105859	-0.237374	0.14037	-0.388889	-0.151584	-0.0555556	0.367312	0.0151515	-0.371307	0.00505051	-0.3721
-0.221318	0.0858586	-0.308398	-0.00505051	-0.308106	-0.0454545	-0.309379	-0.0454545	-0.308335	-0.0555556	-0.308828	-0.0555556	-0.309229	-0.0555556	-0.309471	-0.0555556	-0.309838	-0.0555556	-0.309975	-0.0555556	-0.234524	0.204545	-0.441688	-0.0378788	-0.45626	-0.0681818	-0.462247	-0.0681818	-0.462561	-0.0833333	-0.464469	-0.0833333	-0.462233	-0.0984849	-0.46304	-0.0984849	-0.463587	-0.0984849	-0.464036	-0.0984849	-0.236035	0.143939	-0.395092	-0.143939	-0.0454545	0.368324	0.00505051	-0.371508	-0.00505051	-0.3721
-0.219351	0.0959596	-0.308398	0.00505051	-0.309563	-0.0353535	-0.310836	-0.0353535	-0.310102	-0.0454545	-0.310591	-0.0454545	-0.311006	-0.0454545	-0.311236	-0.0454545	-0.311606	-0.0454545	-0.311735	-0.0454545	-0.220783	0.219697	-0.442633	-0.0227273	-0.458295	-0.0530303	-0.464399	-0.0530303	-0.46529	-0.0681818	-0.467182	-0.0681818	-0.465563	-0.0833333	-0.466378	-0.0833333	-0.466921	-0.0833333	-0.467353	-0.0833333	-0.228683	0.159091	-0.39899	-0.138344	-0.0353535	0.369131	-0.00505051	-0.371508	-0.0151515	-0.371909
-0.217172	0.104857	-0.308081	0.0123405	-0.310695	-0.0252525	-0.311968	-0.0252525	-0.311544	-0.0353535	-0.31203	-0.0353535	-0.312457	-0.0353535	-0.312676	-0.0353535	-0.313051	-0.0353535	-0.313172	-0.0353535	-0.219697	0.220783	-0.443101	-0.00757576	-0.45981	-0.0378788	-0.466005	-0.0378788	-0.467444	-0.0530303	-0.469321	-0.0530303	-0.468284	-0.0681818	-0.469107	-0.0681818	-0.469649	-0.0681818	-0.470052	-0.0681818	-0.227273	0.161464	-0.406514	-0.128788	-0.0252525	0.369733	-0.0151515	-0.371307	-0.0252525	-0.371522
-0.216901	0.106061	-0.307965	0.0151515	-0.311492	-0.0151515	-0.312761	-0.0151515	-0.312661	-0.0252525	-0.313142	-0.0252525	-0.31358	-0.0252525	-0.313792	-0.0252525	-0.314169	-0.0252525	-0.314283	-0.0252525	-0.204545	0.234524	-0.443101	0.00757576	-0.460821	-0.0227273	-0.467082	-0.0227273	-0.469055	-0.0378788	-0.470918	-0.0378788	-0.470438	-0.0530303	-0.471268	-0.0530303	-0.471811	-0.0530303	-0.472179	-0.0530303	-0.219287	0.174242	-0.409091	-0.124975	-0.0151515	0.370131	-0.0175404	-0.371212	-0.0306105	-0.371212
-0.214156	0.116162	-0.307205	0.0252525	-0.31192	-0.00505051	-0.313183	-0.00505051	-0.313442	-0.0151515	-0.313919	-0.0151515	-0.314364	-0.0151515	-0.314569	-0.0151515	-0.31495	-0.0151515	-0.315057	-0.0151515	-0.204139	0.234848	-0.442633	0.0227273	-0.461329	-0.00757576	-0.467628	-0.00757576	-0.470136	-0.0227273	-0.47199	-0.0227273	-0.472053	-0.0378788	-0.472891	-0.0378788	-0.473437	-0.0378788	-0.473769	-0.0378788	-0.217172	0.177108	-0.418103	-0.113636	-0.00505051	0.37033	-0.0252525	-0.370922	-0.0353535	-0.370952
-0.210676	0.126263	-0.306139	0.0353535	-0.31192	0.00505051	-0.313183	0.00505051	-0.313856	-0.00505051	-0.314329	-0.00505051	-0.314778	-0.00505051	-0.31498	-0.00505051	-0.315361	-0.00505051	-0.315465	-0.00505051	-0.189394	0.246131	-0.441688	0.0378788	-0.461329	0.00757576	-0.467628	0.00757576	-0.470685	-0.00757576	-0.472534	-0.00757576	-0.473142	-0.0227273	-0.473988	-0.0227273	-0.474537	-0.0227273	-0.474837	-0.0227273	-0.207197	0.189394	-0.419192	-0.112119	0.00505051	0.37033	-0.0353535	-0.370348	-0.0454545	-0.370208
-0.207071	0.134623	-0.304778	0.0454545	-0.311492	0.0151515	-0.312761	0.0151515	-0.313856	0.00505051	-0.314329	0.00505051	-0.314778	0.00505051	-0.31498	0.00505051	-0.315361	0.00505051	-0.315465	0.00505051	-0.183074	0.25	-0.440247	0.0530303	-0.460821	0.0227273	-0.467082	0.0227273	-0.470685	0.00757576	-0.472534	0.00757576	-0.473698	-0.00757576	-0.474548	-0.00757576	-0.4751	-0.00757576	-0.475381	-0.00757576	-0.207071	0.189536	-0.429293	-0.10012	0.0151515	0.370131	-0.0454545	-0.369578	-0.0555556	-0.369271
-0.206346	0.136364	-0.303119	0.0555556	-0.310695	0.0252525	-0.311968	0.0252525	-0.313442	0.0151515	-0.313919	0.0151515	-0.314364	0.0151515	-0.314569	0.0151515	-0.31495	0.0151515	-0.315057	0.0151515	-0.174242	0.25546	-0.438289	0.0681818	-0.45981	0.0378788	-0.466005	0.0378788	-0.470136	0.0227273	-0.47199	0.0227273	-0.473698	0.00757576	-0.474548	0.00757576	-0.4751	0.00757576	-0.475381	0.00757576	-0.19697	0.20021	-0.430869	-0.0984849	0.0252525	0.369733	-0.0555556	-0.36861	-0.0656566	-0.368137
-0.201307	0.146465	-0.301152	0.0656566	-0.309563	0.0353535	-0.310836	0.0353535	-0.312661	0.0252525	-0.313142	0.0252525	-0.31358	0.0252525	-0.313792	0.0252525	-0.314169	0.0252525	-0.314283	0.0252525	-0.159091	0.262801	-0.435785	0.0833333	-0.458295	0.0530303	-0.464399	0.0530303	-0.469055	0.0378788	-0.470918	0.0378788	-0.473142	0.0227273	-0.473988	0.0227273	-0.474537	0.0227273	-0.474837	0.0227273	-0.192252	0.204545	-0.439394	-0.0883506	0.0353535	0.369131	-0.0656566	-0.367443	-0.0757576	-0.366806
-0.19697	0.153512	-0.298856	0.0757576	-0.308106	0.0454545	-0.309379	0.0454545	-0.311544	0.0353535	-0.31203	0.0353535	-0.312457	0.0353535	-0.312676	0.0353535	-0.313051	0.0353535	-0.313172	0.0353535	-0.152914	0.265152	-0.432705	0.0984849	-0.45626	0.0681818	-0.462247	0.0681818	-0.467444	0.0530303	-0.469321	0.0530303	-0.472053	0.0378788	-0.472891	0.0378788	-0.473437	0.0378788	-0.473769	0.0378788	-0.186869	0.209433	-0.443967	-0.0833333	0.0454545	0.368324	-0.0757576	-0.366075	-0.0858586	-0.365275
-0.195059	0.156566	-0.29798	0.0791319	-0.308081	0.0456007	-0.308081	0.0528342	-0.310102	0.0454545	-0.310591	0.0454545	-0.311006	0.0454545	-0.311236	0.0454545	-0.311606	0.0454545	-0.311735	0.0454545	-0.143939	0.268882	-0.431818	0.102191	-0.453676	0.0833333	-0.462121	0.0688876	-0.46529	0.0681818	-0.467182	0.0681818	-0.470438	0.0530303	-0.471268	0.0530303	-0.471811	0.0530303	-0.472179	0.0530303	-0.176768	0.217247	-0.449495	-0.0759316	0.0555556	0.367312	-0.0858586	-0.364504	-0.0959596	-0.36354
-0.187546	0.166667	-0.296302	0.0858586	-0.30643	0.0555556	-0.307625	0.0555556	-0.308335	0.0555556	-0.308828	0.0555556	-0.309229	0.0555556	-0.309471	0.0555556	-0.309838	0.0555556	-0.309975	0.0555556	-0.128788	0.273876	-0.429217	0.113636	-0.450511	0.0984849	-0.459682	0.0833333	-0.462561	0.0833333	-0.464469	0.0833333	-0.468284	0.0681818	-0.469107	0.0681818	-0.469649	0.0681818	-0.470052	0.0681818	-0.173043	0.219697	-0.455466	-0.0681818	0.0656566	0.366092	-0.0959596	-0.362727	-0.106061	-0.361596
-0.186869	0.167475	-0.293404	0.0959596	-0.304444	0.0656566	-0.305634	0.0656566	-0.308081	0.0567904	-0.308081	0.059185	-0.308081	0.0610822	-0.308081	0.0622802	-0.308081	0.0640257	-0.308081	0.0647139	-0.113636	0.277689	-0.425184	0.128788	-0.44697	0.112704	-0.456546	0.0984849	-0.462121	0.0853524	-0.462121	0.0940564	-0.465563	0.0833333	-0.466378	0.0833333	-0.466921	0.0833333	-0.467353	0.0833333	-0.166667	0.224063	-0.459596	-0.0613246	0.0757576	0.364663	-0.106061	-0.360739	-0.116162	-0.359439
-0.17853	0.176768	-0.290039	0.106061	-0.302127	0.0757576	-0.303312	0.0757576	-0.306342	0.0656566	-0.306809	0.0656566	-0.307173	0.0656566	-0.307415	0.0656566	-0.307758	0.0656566	-0.307895	0.0656566	-0.0998411	0.280303	-0.420489	0.143939	-0.446748	0.113636	-0.4528	0.113636	-0.459394	0.0984849	-0.461196	0.0984849	-0.462233	0.0984849	-0.46304	0.0984849	-0.463587	0.0984849	-0.464036	0.0984849	-0.156566	0.229827	-0.464524	-0.0530303	0.0858586	0.363022	-0.116162	-0.358534	-0.126263	-0.357061
-0.176768	0.17853	-0.287879	0.111796	-0.299454	0.0858586	-0.300634	0.0858586	-0.304032	0.0757576	-0.304502	0.0757576	-0.304852	0.0757576	-0.305108	0.0757576	-0.305448	0.0757576	-0.305592	0.0757576	-0.0984849	0.28061	-0.416667	0.154728	-0.442607	0.128788	-0.448421	0.128788	-0.455642	0.113636	-0.457452	0.113636	-0.462121	0.098917	-0.462121	0.102031	-0.462121	0.104138	-0.462121	0.105859	-0.146465	0.234421	-0.469697	-0.0417049	0.0959596	0.361165	-0.126263	-0.356104	-0.130188	-0.356061
-0.167475	0.186869	-0.286284	0.116162	-0.29798	0.0907584	-0.29798	0.094605	-0.301365	0.0858586	-0.301837	0.0858586	-0.302173	0.0858586	-0.302446	0.0858586	-0.302784	0.0858586	-0.302933	0.0858586	-0.0833333	0.283231	-0.415177	0.159091	-0.437822	0.143939	-0.44697	0.133221	-0.451257	0.128788	-0.453072	0.128788	-0.458492	0.113636	-0.459244	0.113636	-0.459764	0.113636	-0.460189	0.113636	-0.145363	0.234848	-0.471361	-0.0378788	0.106061	0.359087	-0.126429	-0.356061	-0.136364	-0.354538
-0.166667	0.187546	-0.282178	0.126263	-0.296467	0.0959596	-0.297582	0.0959596	-0.298301	0.0959596	-0.298773	0.0959596	-0.299096	0.0959596	-0.299389	0.0959596	-0.299724	0.0959596	-0.299877	0.0959596	-0.0681818	0.285292	-0.409379	0.174242	-0.432343	0.159091	-0.443591	0.143939	-0.44697	0.141704	-0.448029	0.143939	-0.45413	0.128788	-0.454876	0.128788	-0.455403	0.128788	-0.455819	0.128788	-0.136364	0.238773	-0.476252	-0.0227273	0.116162	0.356779	-0.136364	-0.353575	-0.146465	-0.35184
-0.156566	0.195059	-0.277778	0.135926	-0.293098	0.106061	-0.294212	0.106061	-0.29798	0.0968936	-0.29798	0.0982588	-0.29798	0.0991828	-0.29798	0.100045	-0.29798	0.100998	-0.29798	0.101438	-0.0530303	0.287144	-0.402757	0.189394	-0.431818	0.160405	-0.438167	0.159091	-0.446255	0.143939	-0.44697	0.146793	-0.449115	0.143939	-0.449855	0.143939	-0.450391	0.143939	-0.450792	0.143939	-0.126263	0.24235	-0.479151	-0.00757576	0.119051	0.356061	-0.146465	-0.350817	-0.156566	-0.348913
-0.153512	0.19697	-0.277583	0.136364	-0.289253	0.116162	-0.290369	0.116162	-0.29492	0.106061	-0.295365	0.106061	-0.295665	0.106061	-0.295963	0.106061	-0.296274	0.106061	-0.296423	0.106061	-0.0378788	0.288995	-0.401515	0.191999	-0.426449	0.174242	-0.432006	0.174242	-0.440835	0.159091	-0.44255	0.159091	-0.44697	0.149719	-0.44697	0.151682	-0.44697	0.153113	-0.44697	0.15414	-0.116162	0.24522	-0.479151	0.00757576	0.126263	0.354334	-0.156566	-0.347821	-0.166667	-0.345752
-0.146465	0.201307	-0.272691	0.146465	-0.287879	0.119434	-0.287879	0.122054	-0.291079	0.116162	-0.291519	0.116162	-0.291814	0.116162	-0.292132	0.116162	-0.292432	0.116162	-0.292581	0.116162	-0.0227273	0.290875	-0.395671	0.204545	-0.419804	0.189394	-0.431818	0.174665	-0.43469	0.174242	-0.436408	0.174242	-0.443602	0.159091	-0.444297	0.159091	-0.444811	0.159091	-0.445173	0.159091	-0.106061	0.247509	-0.476252	0.0227273	0.136364	0.351692	-0.166667	-0.344581	-0.176768	-0.342354
-0.136364	0.206346	-0.267677	0.15573	-0.285083	0.126263	-0.286145	0.126263	-0.287879	0.123701	-0.287879	0.124704	-0.287879	0.125375	-0.287879	0.126151	-0.28812	0.126263	-0.288269	0.126263	-0.00757576	0.292468	-0.387762	0.219697	-0.416667	0.195881	-0.425421	0.189394	-0.431818	0.180641	-0.431818	0.184395	-0.437489	0.174242	-0.43818	0.174242	-0.438703	0.174242	-0.43905	0.174242	-0.0959596	0.249314	-0.471361	0.0378788	0.146465	0.348804	-0.176768	-0.341093	-0.180836	-0.340909
-0.134623	0.207071	-0.267229	0.156566	-0.280495	0.136364	-0.281564	0.136364	-0.286819	0.126263	-0.287231	0.126263	-0.287509	0.126263	-0.287832	0.126263	-0.287879	0.126783	-0.287879	0.127105	0.00757576	0.292468	-0.386364	0.222169	-0.412558	0.204545	-0.418018	0.204545	-0.427983	0.189394	-0.429611	0.189394	-0.431818	0.186775	-0.431818	0.188249	-0.431818	0.189388	-0.432152	0.189394	-0.0911043	0.25	-0.469697	0.0417049	0.156566	0.345661	-0.177275	-0.340909	-0.186869	-0.338803
-0.126263	0.210676	-0.261363	0.166667	-0.277778	0.141809	-0.277778	0.143912	-0.282236	0.136364	-0.282642	0.136364	-0.282921	0.136364	-0.283266	0.136364	-0.283532	0.136364	-0.283674	0.136364	0.0227273	0.290875	-0.379236	0.234848	-0.404619	0.219697	-0.416667	0.207096	-0.42063	0.204545	-0.422264	0.204545	-0.43066	0.189394	-0.43131	0.189394	-0.431816	0.189394	-0.431818	0.190071	-0.0858586	0.25091	-0.464524	0.0530303	0.166667	0.342257	-0.186869	-0.337499	-0.19697	-0.335064
-0.116162	0.214156	-0.257576	0.172582	-0.275491	0.146465	-0.276517	0.146465	-0.277778	0.145213	-0.277778	0.145985	-0.277808	0.146465	-0.278177	0.146465	-0.278438	0.146465	-0.278579	0.146465	0.0378788	0.288995	-0.371212	0.24763	-0.401515	0.22513	-0.41009	0.219697	-0.416667	0.211999	-0.416667	0.215013	-0.423333	0.204545	-0.423981	0.204545	-0.424495	0.204545	-0.424813	0.204545	-0.0757576	0.252285	-0.459596	0.0613246	0.170432	0.340909	-0.19697	-0.333651	-0.207071	-0.331069
-0.106061	0.216901	-0.25488	0.176768	-0.270046	0.156566	-0.271087	0.156566	-0.277157	0.146465	-0.277539	0.146465	-0.277778	0.146521	-0.277778	0.147202	-0.277778	0.147681	-0.277778	0.147939	0.0530303	0.287144	-0.369717	0.25	-0.396009	0.234848	-0.401515	0.234481	-0.412637	0.219697	-0.4142	0.219697	-0.416667	0.216968	-0.416667	0.218141	-0.416667	0.219074	-0.416667	0.219664	-0.0656566	0.253334	-0.455466	0.0681818	0.176768	0.338692	-0.207071	-0.329534	-0.217172	-0.326813
-0.104857	0.217172	-0.247747	0.186869	-0.267677	0.160599	-0.267677	0.162348	-0.271726	0.156566	-0.272104	0.156566	-0.272377	0.156566	-0.272752	0.156566	-0.272999	0.156566	-0.273133	0.156566	0.0681818	0.285292	-0.35936	0.265152	-0.386519	0.25	-0.401303	0.234848	-0.403939	0.234848	-0.405525	0.234848	-0.415224	0.219697	-0.415842	0.219697	-0.416336	0.219697	-0.416649	0.219697	-0.0555556	0.254125	-0.449495	0.0759316	0.186869	0.334915	-0.215791	-0.325758	-0.219584	-0.325758
-0.0959596	0.219351	-0.247475	0.18723	-0.264122	0.166667	-0.265137	0.166667	-0.267677	0.1634	-0.267677	0.16402	-0.267677	0.164473	-0.267677	0.165117	-0.267677	0.165522	-0.267677	0.16574	0.0833333	0.283231	-0.356061	0.269603	-0.386364	0.250233	-0.391935	0.25	-0.401515	0.238757	-0.401515	0.241289	-0.406548	0.234848	-0.407176	0.234848	-0.407674	0.234848	-0.40801	0.234848	-0.0454545	0.254714	-0.443967	0.0833333	0.19697	0.330851	-0.217172	-0.325163	-0.227273	-0.322399
-0.0858586	0.221318	-0.239983	0.19697	-0.257593	0.176768	-0.258636	0.176768	-0.265746	0.166667	-0.266108	0.166667	-0.266376	0.166667	-0.266759	0.166667	-0.266998	0.166667	-0.267127	0.166667	0.0984849	0.28061	-0.347959	0.280303	-0.376354	0.265152	-0.386364	0.258243	-0.394565	0.25	-0.396109	0.25	-0.401515	0.242891	-0.401515	0.243884	-0.401515	0.244664	-0.401515	0.245215	-0.0353535	0.255146	-0.439394	0.0883506	0.207071	0.32649	-0.227273	-0.320641	-0.237374	-0.317744
-0.0757576	0.222839	-0.237374	0.200118	-0.257576	0.176793	-0.257576	0.178301	-0.259245	0.176768	-0.259611	0.176768	-0.259887	0.176768	-0.260293	0.176768	-0.26054	0.176768	-0.260671	0.176768	0.0998411	0.280303	-0.340909	0.28891	-0.371212	0.272201	-0.381672	0.265152	-0.386364	0.262128	-0.386364	0.264368	-0.39708	0.25	-0.397697	0.25	-0.398178	0.25	-0.398527	0.25	-0.0252525	0.255453	-0.430869	0.0984849	0.208697	0.325758	-0.237374	-0.315831	-0.247475	-0.312817
-0.0656566	0.223981	-0.231424	0.207071	-0.250551	0.186869	-0.251586	0.186869	-0.257576	0.179172	-0.257576	0.179696	-0.257576	0.180092	-0.257576	0.180677	-0.257576	0.181033	-0.257576	0.181219	0.113636	0.277689	-0.335371	0.295455	-0.365217	0.280303	-0.371212	0.279361	-0.384307	0.265152	-0.385829	0.265152	-0.386773	0.265152	-0.387416	0.265152	-0.387907	0.265152	-0.388287	0.265152	-0.0151515	0.255654	-0.429293	0.10012	0.217172	0.321967	-0.247475	-0.310735	-0.251851	-0.310606
-0.0555556	0.224801	-0.227273	0.211626	-0.247475	0.190928	-0.247475	0.192284	-0.252173	0.186869	-0.252532	0.186869	-0.252809	0.186869	-0.253221	0.186869	-0.253471	0.186869	-0.253601	0.186869	0.128788	0.273876	-0.325758	0.306078	-0.356061	0.291797	-0.370509	0.280303	-0.373233	0.280303	-0.374807	0.280303	-0.386364	0.265719	-0.386364	0.266608	-0.386364	0.267286	-0.386364	0.267814	-0.00505051	0.255756	-0.419192	0.112119	0.227273	0.317152	-0.247725	-0.310606	-0.257576	-0.307683
-0.0454545	0.225346	-0.222005	0.217172	-0.2428	0.19697	-0.243843	0.19697	-0.247475	0.193035	-0.247475	0.193502	-0.247475	0.193862	-0.247475	0.194401	-0.247475	0.194734	-0.247475	0.194902	0.143939	0.268882	-0.321476	0.310606	-0.353074	0.295455	-0.358492	0.295455	-0.371212	0.282898	-0.371212	0.28491	-0.375734	0.280303	-0.376386	0.280303	-0.376874	0.280303	-0.377264	0.280303	0.00505051	0.255756	-0.418103	0.113636	0.237374	0.312015	-0.257576	-0.30547	-0.267677	-0.302322
-0.0353535	0.22566	-0.217172	0.222005	-0.237374	0.203488	-0.237374	0.204733	-0.244414	0.19697	-0.244775	0.19697	-0.245054	0.19697	-0.245474	0.19697	-0.245734	0.19697	-0.245864	0.19697	0.152914	0.265152	-0.310606	0.321476	-0.340909	0.309415	-0.356061	0.298338	-0.36125	0.295455	-0.362834	0.295455	-0.371212	0.286079	-0.371212	0.286917	-0.371212	0.287539	-0.371212	0.288037	0.0151515	0.255654	-0.409091	0.124975	0.240047	0.310606	-0.267677	-0.299913	-0.277778	-0.29669
-0.0252525	0.22579	-0.211626	0.227273	-0.234298	0.207071	-0.235365	0.207071	-0.237374	0.205397	-0.237374	0.205824	-0.237374	0.206156	-0.237374	0.206655	-0.237374	0.206971	-0.237424	0.207071	0.159091	0.262801	-0.306078	0.325758	-0.339834	0.310606	-0.345424	0.310606	-0.356061	0.301588	-0.356061	0.303451	-0.363739	0.295455	-0.364413	0.295455	-0.364909	0.295455	-0.365303	0.295455	0.0252525	0.255453	-0.406514	0.128788	0.247475	0.306662	-0.275443	-0.295455	-0.27995	-0.295455
-0.0151515	0.225798	-0.207071	0.231424	-0.227273	0.214765	-0.227273	0.215929	-0.235931	0.207071	-0.236299	0.207071	-0.236585	0.207071	-0.237016	0.207071	-0.237288	0.207071	-0.237374	0.207128	0.174242	0.25546	-0.295455	0.335371	-0.325758	0.325348	-0.340909	0.315526	-0.348215	0.310606	-0.349832	0.310606	-0.356061	0.3045	-0.356061	0.305304	-0.356061	0.305892	-0.356061	0.306349	0.0353535	0.255146	-0.39899	0.138344	0.257576	0.30101	-0.277778	-0.294084	-0.287879	-0.290835
-0.00505051	0.225763	-0.200118	0.237374	-0.224984	0.217172	-0.22609	0.217172	-0.227273	0.216536	-0.227273	0.216936	-0.227346	0.217172	-0.227801	0.217172	-0.228094	0.217172	-0.228236	0.217172	0.183074	0.25	-0.28891	0.340909	-0.325348	0.325758	-0.331157	0.325758	-0.340909	0.31855	-0.340909	0.320303	-0.350734	0.310606	-0.35144	0.310606	-0.351954	0.310606	-0.352349	0.310606	0.0454545	0.254714	-0.395092	0.143939	0.266972	0.295455	-0.287879	-0.288007	-0.29798	-0.284705
0.00505051	0.225763	-0.19697	0.239983	-0.217172	0.224984	-0.217172	0.22609	-0.226667	0.217172	-0.227048	0.217172	-0.227273	0.217248	-0.227273	0.217723	-0.227273	0.218029	-0.227273	0.218177	0.189394	0.246131	-0.280303	0.347959	-0.310606	0.339834	-0.325758	0.331157	-0.334029	0.325758	-0.335701	0.325758	-0.340909	0.321272	-0.340909	0.322046	-0.340909	0.322608	-0.340909	0.32303	0.0555556	0.254125	-0.388889	0.151584	0.267677	0.29503	-0.29798	-0.281614	-0.305002	-0.280303
0.0151515	0.225798	-0.18723	0.247475	-0.214765	0.227273	-0.215929	0.227273	-0.217172	0.226667	-0.217172	0.227048	-0.217248	0.227273	-0.217723	0.227273	-0.218029	0.227273	-0.218177	0.227273	0.204139	0.234848	-0.269603	0.356061	-0.309415	0.340909	-0.315526	0.340909	-0.325758	0.334029	-0.325758	0.335701	-0.336623	0.325758	-0.337364	0.325758	-0.337902	0.325758	-0.338304	0.325758	0.0656566	0.253334	-0.383367	0.159091	0.277778	0.288797	-0.300018	-0.280303	-0.308081	-0.278314
0.0252525	0.22579	-0.186869	0.247747	-0.207071	0.234298	-0.207071	0.235365	-0.216536	0.227273	-0.216936	0.227273	-0.217172	0.227346	-0.217172	0.227801	-0.217172	0.228094	-0.217172	0.228236	0.204545	0.234524	-0.265152	0.35936	-0.295455	0.353074	-0.310606	0.345424	-0.31855	0.340909	-0.320303	0.340909	-0.325758	0.336623	-0.325758	0.337364	-0.325758	0.337902	-0.325758	0.338304	0.0757576	0.252285	-0.378788	0.164585	0.287879	0.282199	-0.308081	-0.274953	-0.318182	-0.271713
0.0353535	0.22566	-0.176768	0.25488	-0.203488	0.237374	-0.204733	0.237374	-0.207071	0.235931	-0.207071	0.236299	-0.207071	0.236585	-0.207071	0.237016	-0.207071	0.237288	-0.207128	0.237374	0.219697	0.220783	-0.25	0.369717	-0.291797	0.356061	-0.298338	0.356061	-0.310606	0.348215	-0.310606	0.349832	-0.321272	0.340909	-0.322046	0.340909	-0.322608	0.340909	-0.32303	0.340909	0.0858586	0.25091	-0.371372	0.174242	0.290707	0.280303	-0.318182	-0.268045	-0.327989	-0.265152
0.0454545	0.225346	-0.172582	0.257576	-0.19697	0.2428	-0.19697	0.243843	-0.205397	0.237374	-0.205824	0.237374	-0.206156	0.237374	-0.206655	0.237374	-0.206971	0.237374	-0.207071	0.237424	0.220783	0.219697	-0.24763	0.371212	-0.280303	0.365217	-0.295455	0.358492	-0.301588	0.356061	-0.303451	0.356061	-0.310606	0.350734	-0.310606	0.35144	-0.310606	0.351954	-0.310606	0.352349	0.0911043	0.25	-0.368687	0.177432	0.29798	0.275274	-0.322388	-0.265152	-0.328283	-0.264947
0.0555556	0.224801	-0.166667	0.261363	-0.190928	0.247475	-0.192284	0.247475	-0.19697	0.244414	-0.19697	0.244775	-0.19697	0.245054	-0.19697	0.245474	-0.19697	0.245734	-0.19697	0.245864	0.234524	0.204545	-0.234848	0.379236	-0.272201	0.371212	-0.280303	0.370509	-0.295455	0.36125	-0.295455	0.362834	-0.3045	0.356061	-0.305304	0.356061	-0.305892	0.356061	-0.306349	0.356061	0.0959596	0.249314	-0.359189	0.189394	0.308081	0.268008	-0.328283	-0.260938	-0.338384	-0.258044
0.0656566	0.223981	-0.156566	0.267229	-0.186869	0.250551	-0.186869	0.251586	-0.193035	0.247475	-0.193502	0.247475	-0.193862	0.247475	-0.194401	0.247475	-0.194734	0.247475	-0.194902	0.247475	0.234848	0.204139	-0.222169	0.386364	-0.265152	0.376354	-0.279361	0.371212	-0.282898	0.371212	-0.28491	0.371212	-0.295455	0.363739	-0.295455	0.364413	-0.295455	0.364909	-0.295455	0.365303	0.106061	0.247509	-0.358586	0.190098	0.311984	0.265152	-0.338384	-0.253689	-0.348485	-0.251111
0.0757576	0.222839	-0.15573	0.267677	-0.176793	0.257576	-0.178301	0.257576	-0.186869	0.252173	-0.186869	0.252532	-0.186869	0.252809	-0.186869	0.253221	-0.186869	0.253471	-0.186869	0.253601	0.246131	0.189394	-0.219697	0.387762	-0.250233	0.386364	-0.265152	0.381672	-0.280303	0.373233	-0.280303	0.374807	-0.286079	0.371212	-0.286917	0.371212	-0.287539	0.371212	-0.288037	0.371212	0.116162	0.24522	-0.348485	0.20237	0.318182	0.260442	-0.343583	-0.25	-0.350166	-0.25
0.0858586	0.221318	-0.146465	0.272691	-0.176768	0.257593	-0.176768	0.258636	-0.179172	0.257576	-0.179696	0.257576	-0.180092	0.257576	-0.180677	0.257576	-0.181033	0.257576	-0.181219	0.257576	0.25	0.183074	-0.204545	0.395671	-0.25	0.386519	-0.258243	0.386364	-0.265152	0.384307	-0.265152	0.385829	-0.280303	0.375734	-0.280303	0.376386	-0.280303	0.376874	-0.280303	0.377264	0.126263	0.24235	-0.346732	0.204545	0.328283	0.252618	-0.348485	-0.246343	-0.358586	-0.244139
0.0959596	0.219351	-0.136364	0.277583	-0.166667	0.264122	-0.166667	0.265137	-0.176768	0.259245	-0.176768	0.259611	-0.176768	0.259887	-0.176768	0.260293	-0.176768	0.26054	-0.176768	0.260671	0.25546	0.174242	-0.191999	0.401515	-0.234848	0.396009	-0.25	0.391935	-0.262128	0.386364	-0.264368	0.386364	-0.265719	0.386364	-0.266608	0.386364	-0.267286	0.386364	-0.267814	0.386364	0.136364	0.238773	-0.338384	0.214122	0.331672	0.25	-0.358586	-0.238973	-0.368687	-0.237299
0.104857	0.217172	-0.135926	0.277778	-0.160599	0.267677	-0.162348	0.267677	-0.166667	0.265746	-0.166667	0.266108	-0.166667	0.266376	-0.166667	0.266759	-0.166667	0.266998	-0.166667	0.267127	0.262801	0.159091	-0.189394	0.402757	-0.22513	0.401515	-0.234848	0.401303	-0.25	0.394565	-0.25	0.396109	-0.265152	0.386773	-0.265152	0.387416	-0.265152	0.387907	-0.265152	0.388287	0.145363	0.234848	-0.333518	0.219697	0.338384	0.244553	-0.364436	-0.234848	-0.372531	-0.234848
0.106061	0.216901	-0.126263	0.282178	-0.156566	0.270046	-0.156566	0.271087	-0.1634	0.267677	-0.16402	0.267677	-0.164473	0.267677	-0.165117	0.267677	-0.165522	0.267677	-0.16574	0.267677	0.265152	0.152914	-0.174242	0.409379	-0.219697	0.404619	-0.234481	0.401515	-0.238757	0.401515	-0.241289	0.401515	-0.25	0.39708	-0.25	0.397697	-0.25	0.398178	-0.25	0.398527	0.146465	0.234421	-0.328283	0.225277	0.348485	0.236337	-0.368687	-0.231661	-0.378788	-0.2306
0.116162	0.214156	-0.116162	0.286284	-0.146465	0.275491	-0.146465	0.276517	-0.156566	0.271726	-0.156566	0.272104	-0.156566	0.272377	-0.156566	0.272752	-0.156566	0.272999	-0.156566	0.273133	0.268882	0.143939	-0.159091	0.415177	-0.204545	0.412558	-0.219697	0.41009	-0.234848	0.403939	-0.234848	0.405525	-0.242891	0.401515	-0.243884	0.401515	-0.244664	0.401515	-0.245215	0.401515	0.156566	0.229827	-0.319143	0.234848	0.350371	0.234848	-0.378788	-0.224478	-0.388889	-0.224206
0.126263	0.210676	-0.111796	0.287879	-0.141809	0.277778	-0.143912	0.277778	-0.146465	0.277157	-0.146465	0.277539	-0.146521	0.277778	-0.147202	0.277778	-0.147681	0.277778	-0.147939	0.277778	0.273876	0.128788	-0.154728	0.416667	-0.195881	0.416667	-0.207096	0.416667	-0.219697	0.412637	-0.219697	0.4142	-0.234848	0.406548	-0.234848	0.407176	-0.234848	0.407674	-0.234848	0.40801	0.166667	0.224063	-0.318182	0.235796	0.358586	0.227953	-0.385955	-0.219697	-0.396732	-0.219697
0.134623	0.207071	-0.106061	0.290039	-0.136364	0.280495	-0.136364	0.281564	-0.145213	0.277778	-0.145985	0.277778	-0.146465	0.277808	-0.146465	0.278177	-0.146465	0.278438	-0.146465	0.278579	0.277689	0.113636	-0.143939	0.420489	-0.189394	0.419804	-0.204545	0.418018	-0.211999	0.416667	-0.215013	0.416667	-0.219697	0.415224	-0.219697	0.415842	-0.219697	0.416336	-0.219697	0.416649	0.173043	0.219697	-0.308081	0.245685	0.368581	0.219697	-0.388889	-0.21761	-0.39899	-0.218315
0.136364	0.206346	-0.0959596	0.293404	-0.126263	0.285083	-0.126263	0.286145	-0.136364	0.282236	-0.136364	0.282642	-0.136364	0.282921	-0.136364	0.283266	-0.136364	0.283532	-0.136364	0.283674	0.280303	0.0998411	-0.128788	0.425184	-0.174242	0.426449	-0.189394	0.425421	-0.204545	0.42063	-0.204545	0.422264	-0.216968	0.416667	-0.218141	0.416667	-0.219074	0.416667	-0.219664	0.416667	0.176768	0.217247	-0.30352	0.25	0.368687	0.219603	-0.39899	-0.211154	-0.409091	-0.213038
0.146465	0.201307	-0.0858586	0.296302	-0.119434	0.287879	-0.122054	0.287879	-0.126263	0.286819	-0.126263	0.287231	-0.126263	0.287509	-0.126263	0.287832	-0.126783	0.287879	-0.127105	0.287879	0.28061	0.0984849	-0.113636	0.429217	-0.160405	0.431818	-0.174665	0.431818	-0.189394	0.427983	-0.189394	0.429611	-0.204545	0.423333	-0.204545	0.423981	-0.204545	0.424495	-0.204545	0.424813	0.186869	0.209433	-0.29798	0.25501	0.378788	0.211242	-0.409091	-0.20556	-0.419192	-0.208576
0.153512	0.19697	-0.0791319	0.29798	-0.116162	0.289253	-0.116162	0.290369	-0.123701	0.287879	-0.124704	0.287879	-0.125375	0.287879	-0.126151	0.287879	-0.126263	0.28812	-0.126263	0.288269	0.283231	0.0833333	-0.102191	0.431818	-0.159091	0.432343	-0.174242	0.432006	-0.180641	0.431818	-0.184395	0.431818	-0.189394	0.43066	-0.189394	0.43131	-0.189394	0.431816	-0.190071	0.431818	0.192252	0.204545	-0.287879	0.263764	0.387284	0.204545	-0.411282	-0.204545	-0.429293	-0.20476
0.156566	0.195059	-0.0757576	0.298856	-0.106061	0.293098	-0.106061	0.294212	-0.116162	0.291079	-0.116162	0.291519	-0.116162	0.291814	-0.116162	0.292132	-0.116162	0.292432	-0.116162	0.292581	0.285292	0.0681818	-0.0984849	0.432705	-0.143939	0.437822	-0.159091	0.438167	-0.174242	0.43469	-0.174242	0.436408	-0.186775	0.431818	-0.188249	0.431818	-0.189388	0.431818	-0.189394	0.432152	0.19697	0.20021	-0.286229	0.265152	0.388889	0.203219	-0.419192	-0.200758	-0.429947	-0.204545
0.166667	0.187546	-0.0656566	0.301152	-0.0959596	0.296467	-0.0959596	0.297582	-0.106061	0.29492	-0.106061	0.295365	-0.106061	0.295665	-0.106061	0.295963	-0.106061	0.296274	-0.106061	0.296423	0.287144	0.0530303	-0.0833333	0.435785	-0.128788	0.442607	-0.143939	0.443591	-0.159091	0.440835	-0.159091	0.44255	-0.174242	0.437489	-0.174242	0.43818	-0.174242	0.438703	-0.174242	0.43905	0.207071	0.189536	-0.277778	0.272017	0.39899	0.195823	-0.429293	-0.196542	-0.439394	-0.201292
0.167475	0.186869	-0.0555556	0.303119	-0.0907584	0.29798	-0.094605	0.29798	-0.0968936	0.29798	-0.0982588	0.29798	-0.0991828	0.29798	-0.100045	0.29798	-0.100998	0.29798	-0.101438	0.29798	0.288995	0.0378788	-0.0681818	0.438289	-0.113636	0.446748	-0.133221	0.44697	-0.143939	0.446255	-0.146793	0.44697	-0.159091	0.443602	-0.159091	0.444297	-0.159091	0.444811	-0.159091	0.445173	0.207197	0.189394	-0.267677	0.279703	0.409091	0.18942	-0.439394	-0.192777	-0.449495	-0.198083
0.176768	0.17853	-0.0454545	0.304778	-0.0858586	0.299454	-0.0858586	0.300634	-0.0959596	0.298301	-0.0959596	0.298773	-0.0959596	0.299096	-0.0959596	0.299389	-0.0959596	0.299724	-0.0959596	0.299877	0.290875	0.0227273	-0.0530303	0.440247	-0.112704	0.44697	-0.128788	0.448421	-0.141704	0.44697	-0.143939	0.448029	-0.149719	0.44697	-0.151682	0.44697	-0.153113	0.44697	-0.15414	0.44697	0.217172	0.177108	-0.266863	0.280303	0.40914	0.189394	-0.449221	-0.189394	-0.459596	-0.194963
0.17853	0.176768	-0.0353535	0.306139	-0.0757576	0.302127	-0.0757576	0.303312	-0.0858586	0.301365	-0.0858586	0.301837	-0.0858586	0.302173	-0.0858586	0.302446	-0.0858586	0.302784	-0.0858586	0.302933	0.292468	0.00757576	-0.0378788	0.441688	-0.0984849	0.450511	-0.113636	0.4528	-0.128788	0.451257	-0.128788	0.453072	-0.143939	0.449115	-0.143939	0.449855	-0.143939	0.450391	-0.143939	0.450792	0.219287	0.174242	-0.257576	0.286983	0.419192	0.183684	-0.449495	-0.189293	-0.469697	-0.191734
0.186869	0.167475	-0.0252525	0.307205	-0.0656566	0.304444	-0.0656566	0.305634	-0.0757576	0.304032	-0.0757576	0.304502	-0.0757576	0.304852	-0.0757576	0.305108	-0.0757576	0.305448	-0.0757576	0.305592	0.292468	-0.00757576	-0.0227273	0.442633	-0.0833333	0.453676	-0.0984849	0.456546	-0.113636	0.455642	-0.113636	0.457452	-0.128788	0.45413	-0.128788	0.454876	-0.128788	0.455403	-0.128788	0.455819	0.227273	0.161464	-0.247475	0.293752	0.429293	0.17858	-0.459596	-0.185722	-0.476364	-0.189394
0.187546	0.166667	-0.0151515	0.307965	-0.0555556	0.30643	-0.0555556	0.307625	-0.0656566	0.306342	-0.0656566	0.306809	-0.0656566	0.307173	-0.0656566	0.307415	-0.0656566	0.307758	-0.0656566	0.307895	0.290875	-0.0227273	-0.00757576	0.443101	-0.0681818	0.45626	-0.0833333	0.459682	-0.0984849	0.459394	-0.0984849	0.461196	-0.113636	0.458492	-0.113636	0.459244	-0.113636	0.459764	-0.113636	0.460189	0.228683	0.159091	-0.244818	0.295455	0.438799	0.174242	-0.469697	-0.181995	-0.479798	-0.188088
0.195059	0.156566	-0.0123405	0.308081	-0.0456007	0.308081	-0.0528342	0.308081	-0.0567904	0.308081	-0.059185	0.308081	-0.0610822	0.308081	-0.0622802	0.308081	-0.0640257	0.308081	-0.0647139	0.308081	0.288995	-0.0378788	0.00757576	0.443101	-0.0530303	0.458295	-0.0688876	0.462121	-0.0853524	0.462121	-0.0940564	0.462121	-0.098917	0.462121	-0.102031	0.462121	-0.104138	0.462121	-0.105859	0.462121	0.236035	0.143939	-0.237374	0.300173	0.439394	0.173947	-0.479798	-0.177843	-0.489899	-0.183602
0.19697	0.153512	-0.00505051	0.308398	-0.0454545	0.308106	-0.0454545	0.309379	-0.0555556	0.308335	-0.0555556	0.308828	-0.0555556	0.309229	-0.0555556	0.309471	-0.0555556	0.309838	-0.0555556	0.309975	0.287144	-0.0530303	0.0227273	0.442633	-0.0378788	0.45981	-0.0681818	0.462247	-0.0833333	0.462561	-0.0833333	0.464469	-0.0984849	0.462233	-0.0984849	0.46304	-0.0984849	0.463587	-0.0984849	0.464036	0.237374	0.14037	-0.227273	0.306177	0.449495	0.169378	-0.487278	-0.174242	-0.5	-0.178099
0.201307	0.146465	0.00505051	0.308398	-0.0353535	0.309563	-0.0353535	0.310836	-0.0454545	0.310102	-0.0454545	0.310591	-0.0454545	0.311006	-0.0454545	0.311236	-0.0454545	0.311606	-0.0454545	0.311735	0.285292	-0.0681818	0.0378788	0.441688	-0.0227273	0.460821	-0.0530303	0.464399	-0.0681818	0.46529	-0.0681818	0.467182	-0.0833333	0.465563	-0.0833333	0.466378	-0.0833333	0.466921	-0.0833333	0.467353	0.241832	0.128788	-0.219277	0.310606	0.459596	0.164903	-0.489899	-0.172885	-0.5	0.178099
0.206346	0.136364	0.0123405	0.308081	-0.0252525	0.310695	-0.0252525	0.311968	-0.0353535	0.311544	-0.0353535	0.31203	-0.0353535	0.312457	-0.0353535	0.312676	-0.0353535	0.313051	-0.0353535	0.313172	0.283231	-0.0833333	0.0530303	0.440247	-0.00757576	0.461329	-0.0378788	0.466005	-0.0530303	0.467444	-0.0530303	0.469321	-0.0681818	0.468284	-0.0681818	0.469107	-0.0681818	0.469649	-0.0681818	0.470052	0.246137	0.113636	-0.217172	0.311774	0.469697	0.160236	-0.5	-0.166684	-0.489899	0.183602
0.207071	0.134623	0.0151515	0.307965	-0.0151515	0.311492	-0.0151515	0.312761	-0.0252525	0.312661	-0.0252525	0.313142	-0.0252525	0.31358	-0.0252525	0.313792	-0.0252525	0.314169	-0.0252525	0.314283	0.28061	-0.0984849	0.0681818	0.438289	0.00757576	0.461329	-0.0227273	0.467082	-0.0378788	0.469055	-0.0378788	0.470918	-0.0530303	0.470438	-0.0530303	0.471268	-0.0530303	0.471811	-0.0530303	0.472179	0.247475	0.107238	-0.207071	0.317122	0.471963	0.159091	-0.5	0.166684	-0.479798	0.188088
0.210676	0.126263	0.0252525	0.307205	-0.00505051	0.31192	-0.00505051	0.313183	-0.0151515	0.313442	-0.0151515	0.313919	-0.0151515	0.314364	-0.0151515	0.314569	-0.0151515	0.31495	-0.0151515	0.315057	0.280303	-0.0998411	0.0833333	0.435785	0.0227273	0.460821	-0.00757576	0.467628	-0.0227273	0.470136	-0.0227273	0.47199	-0.0378788	0.472053	-0.0378788	0.472891	-0.0378788	0.473437	-0.0378788	0.473769	0.249472	0.0984849	-0.19697	0.322054	0.479798	0.154841	-0.489899	0.172885	-0.476364	0.189394
0.214156	0.116162	0.0353535	0.306139	0.00505051	0.31192	0.00505051	0.313183	-0.00505051	0.313856	-0.00505051	0.314329	-0.00505051	0.314778	-0.00505051	0.31498	-0.00505051	0.315361	-0.00505051	0.315465	0.277689	-0.113636	0.0984849	0.432705	0.0378788	0.45981	0.00757576	0.467628	-0.00757576	0.470685	-0.00757576	0.472534	-0.0227273	0.473142	-0.0227273	0.473988	-0.0227273	0.474537	-0.0227273	0.474837	0.251952	0.0833333	-0.188779	0.325758	0.489899	0.148571	-0.487278	0.174242	-0.469697	0.191734
0.216901	0.106061	0.0454545	0.304778	0.0151515	0.311492	0.0151515	0.312761	0.00505051	0.313856	0.00505051	0.314329	0.00505051	0.314778	0.00505051	0.31498	0.00505051	0.315361	0.00505051	0.315465	0.273876	-0.128788	0.102191	0.431818	0.0530303	0.458295	0.0227273	0.467082	0.00757576	0.470685	0.00757576	0.472534	-0.00757576	0.473698	-0.00757576	0.474548	-0.00757576	0.4751	-0.00757576	0.475381	0.253641	0.0681818	-0.186869	0.326637	0.496264	0.143939	-0.479798	0.177843	-0.459596	0.194963
0.217172	0.104857	0.0555556	0.303119	0.0252525	0.310695	0.0252525	0.311968	0.0151515	0.313442	0.0151515	0.313919	0.0151515	0.314364	0.0151515	0.314569	0.0151515	0.31495	0.0151515	0.315057	0.268882	-0.143939	0.113636	0.429217	0.0681818	0.45626	0.0378788	0.466005	0.0227273	0.470136	0.0227273	0.47199	0.00757576	0.473698	0.00757576	0.474548	0.00757576	0.4751	0.00757576	0.475381	0.25477	0.0530303	-0.176768	0.331041	0.5	0.141045	-0.469697	0.181995	-0.449495	0.198083
0.219351	0.0959596	0.0656566	0.301152	0.0353535	0.309563	0.0353535	0.310836	0.0252525	0.312661	0.0252525	0.313142	0.0252525	0.31358	0.0252525	0.313792	0.0252525	0.314169	0.0252525	0.314283	0.265152	-0.152914	0.128788	0.425184	0.0833333	0.453676	0.0530303	0.464399	0.0378788	0.469055	0.0378788	0.470918	0.0227273	0.473142	0.0227273	0.473988	0.0227273	0.474537	0.0227273	0.474837	0.255517	0.0378788	-0.166667	0.335092			-0.459596	0.185722	-0.439394	0.201292
0.221318	0.0858586	0.0757576	0.298856	0.0454545	0.308106	0.0454545	0.309379	0.0353535	0.311544	0.0353535	0.31203	0.0353535	0.312457	0.0353535	0.312676	0.0353535	0.313051	0.0353535	0.313172	0.262801	-0.159091	0.143939	0.420489	0.0984849	0.450511	0.0681818	0.462247	0.0530303	0.467444	0.0530303	0.469321	0.0378788	0.472053	0.0378788	0.472891	0.0378788	0.473437	0.0378788	0.473769	0.255995	0.0227273	-0.156566	0.338807			-0.449495	0.189293	-0.429947	0.204545
0.222839	0.0757576	0.0791319	0.29798	0.0456007	0.308081	0.0528342	0.308081	0.0454545	0.310102	0.0454545	0.310591	0.0454545	0.311006	0.0454545	0.311236	0.0454545	0.311606	0.0454545	0.311735	0.25546	-0.174242	0.154728	0.416667	0.112704	0.44697	0.0688876	0.462121	0.0681818	0.46529	0.0681818	0.467182	0.0530303	0.470438	0.0530303	0.471268	0.0530303	0.471811	0.0530303	0.472179	0.25624	0.00757576	-0.150382	0.340909			-0.449221	0.189394	-0.429293	0.20476
0.223981	0.0656566	0.0858586	0.296302	0.0555556	0.30643	0.0555556	0.307625	0.0555556	0.308335	0.0555556	0.308828	0.0555556	0.309229	0.0555556	0.309471	0.0555556	0.309838	0.0555556	0.309975	0.25	-0.183074	0.159091	0.415177	0.113636	0.446748	0.0833333	0.459682	0.0833333	0.462561	0.0833333	0.464469	0.0681818	0.468284	0.0681818	0.469107	0.0681818	0.469649	0.0681818	0.470052	0.25624	-0.00757576	-0.146465	0.342288			-0.439394	0.192777	-0.419192	0.208576
0.224801	0.0555556	0.0959596	0.293404	0.0656566	0.304444	0.0656566	0.305634	0.0567904	0.308081	0.059185	0.308081	0.0610822	0.308081	0.0622802	0.308081	0.0640257	0.308081	0.0647139	0.308081	0.246131	-0.189394	0.174242	0.409379	0.128788	0.442607	0.0984849	0.456546	0.0853524	0.462121	0.0940564	0.462121	0.0833333	0.465563	0.0833333	0.466378	0.0833333	0.466921	0.0833333	0.467353	0.255995	-0.0227273	-0.136364	0.345589			-0.429293	0.196542	-0.409091	0.213038
0.225346	0.0454545	0.106061	0.290039	0.0757576	0.302127	0.0757576	0.303312	0.0656566	0.306342	0.0656566	0.306809	0.0656566	0.307173	0.0656566	0.307415	0.0656566	0.307758	0.0656566	0.307895	0.234848	-0.204139	0.189394	0.402757	0.143939	0.437822	0.113636	0.4528	0.0984849	0.459394	0.0984849	0.461196	0.0984849	0.462233	0.0984849	0.46304	0.0984849	0.463587	0.0984849	0.464036	0.255517	-0.0378788	-0.126263	0.348593			-0.419192	0.200758	-0.39899	0.218315
0.22566	0.0353535	0.111796	0.287879	0.0858586	0.299454	0.0858586	0.300634	0.0757576	0.304032	0.0757576	0.304502	0.0757576	0.304852	0.0757576	0.305108	0.0757576	0.305448	0.0757576	0.305592	0.234524	-0.204545	0.191999	0.401515	0.159091	0.432343	0.128788	0.448421	0.113636	0.455642	0.113636	0.457452	0.098917	0.462121	0.102031	0.462121	0.104138	0.462121	0.105859	0.462121	0.25477	-0.0530303	-0.116162	0.351314			-0.411282	0.204545	-0.396732	0.219697
0.22579	0.0252525	0.116162	0.286284	0.0907584	0.29798	0.094605	0.29798	0.0858586	0.301365	0.0858586	0.301837	0.0858586	0.302173	0.0858586	0.302446	0.0858586	0.302784	0.0858586	0.302933	0.220783	-0.219697	0.204545	0.395671	0.160405	0.431818	0.133221	0.44697	0.128788	0.451257	0.128788	0.453072	0.113636	0.458492	0.113636	0.459244	0.113636	0.459764	0.113636	0.460189	0.253641	-0.0681818	-0.106061	0.353767			-0.409091	0.20556	-0.388889	0.224206
0.225798	0.0151515	0.126263	0.282178	0.0959596	0.296467	0.0959596	0.297582	0.0959596	0.298301	0.0959596	0.298773	0.0959596	0.299096	0.0959596	0.299389	0.0959596	0.299724	0.0959596	0.299877	0.219697	-0.220783	0.219697	0.387762	0.174242	0.426449	0.143939	0.443591	0.141704	0.44697	0.143939	0.448029	0.128788	0.45413	0.128788	0.454876	0.128788	0.455403	0.128788	0.455819	0.251952	-0.0833333	-0.0959596	0.355964			-0.39899	0.211154	-0.378788	0.2306
0.225763	0.00505051	0.135926	0.277778	0.106061	0.293098	0.106061	0.294212	0.0968936	0.29798	0.0982588	0.29798	0.0991828	0.29798	0.100045	0.29798	0.100998	0.29798	0.101438	0.29798	0.204545	-0.234524	0.222169	0.386364	0.189394	0.419804	0.159091	0.438167	0.143939	0.446255	0.146793	0.44697	0.143939	0.449115	0.143939	0.449855	0.143939	0.450391	0.143939	0.450792	0.249472	-0.0984849	-0.0954678	0.356061			-0.388889	0.21761	-0.372531	0.234848
0.225763	-0.00505051	0.136364	0.277583	0.116162	0.289253	0.116162	0.290369	0.106061	0.29492	0.106061	0.295365	0.106061	0.295665	0.106061	0.295963	0.106061	0.296274	0.106061	0.296423	0.204139	-0.234848	0.234848	0.379236	0.195881	0.416667	0.174242	0.432006	0.159091	0.440835	0.159091	0.44255	0.149719	0.44697	0.151682	0.44697	0.153113	0.44697	0.15414	0.44697	0.247475	-0.107238	-0.0858586	0.358052			-0.385955	0.219697	-0.368687	0.237299
0.225798	-0.0151515	0.146465	0.272691	0.119434	0.287879	0.122054	0.287879	0.116162	0.291079	0.116162	0.291519	0.116162	0.291814	0.116162	0.292132	0.116162	0.292432	0.116162	0.292581	0.189394	-0.246131	0.24763	0.371212	0.204545	0.412558	0.174665	0.431818	0.174242	0.43469	0.174242	0.436408	0.159091	0.443602	0.159091	0.444297	0.159091	0.444811	0.159091	0.445173	0.246137	-0.113636	-0.0757576	0.359899			-0.378788	0.224478	-0.358586	0.244139
0.22579	-0.0252525	0.15573	0.267677	0.126263	0.285083	0.126263	0.286145	0.123701	0.287879	0.124704	0.287879	0.125375	0.287879	0.126151	0.287879	0.126263	0.28812	0.126263	0.288269	0.183074	-0.25	0.25	0.369717	0.219697	0.404619	0.189394	0.425421	0.180641	0.431818	0.184395	0.431818	0.174242	0.437489	0.174242	0.43818	0.174242	0.438703	0.174242	0.43905	0.241832	-0.128788	-0.0656566	0.361505			-0.368687	0.231661	-0.350166	0.25
0.22566	-0.0353535	0.156566	0.267229	0.136364	0.280495	0.136364	0.281564	0.126263	0.286819	0.126263	0.287231	0.126263	0.287509	0.126263	0.287832	0.126783	0.287879	0.127105	0.287879	0.174242	-0.25546	0.265152	0.35936	0.22513	0.401515	0.204545	0.418018	0.189394	0.427983	0.189394	0.429611	0.186775	0.431818	0.188249	0.431818	0.189388	0.431818	0.189394	0.432152	0.237374	-0.14037	-0.0555556	0.362875			-0.364436	0.234848	-0.348485	0.251111
0.225346	-0.0454545	0.166667	0.261363	0.141809	0.277778	0.143912	0.277778	0.136364	0.282236	0.136364	0.282642	0.136364	0.282921	0.136364	0.283266	0.136364	0.283532	0.136364	0.283674	0.159091	-0.262801	0.269603	0.356061	0.234848	0.396009	0.207096	0.416667	0.204545	0.42063	0.204545	0.422264	0.189394	0.43066	0.189394	0.43131	0.189394	0.431816	0.190071	0.431818	0.236035	-0.143939	-0.0454545	0.364012			-0.358586	0.238973	-0.338384	0.258044
0.224801	-0.0555556	0.172582	0.257576	0.146465	0.275491	0.146465	0.276517	0.145213	0.277778	0.145985	0.277778	0.146465	0.277808	0.146465	0.278177	0.146465	0.278438	0.146465	0.278579	0.152914	-0.265152	0.280303	0.347959	0.25	0.386519	0.219697	0.41009	0.211999	0.416667	0.215013	0.416667	0.204545	0.423333	0.204545	0.423981	0.204545	0.424495	0.204545	0.424813	0.228683	-0.159091	-0.0353535	0.364919			-0.348485	0.246343	-0.328283	0.264947
0.223981	-0.0656566	0.176768	0.25488	0.156566	0.270046	0.156566	0.271087	0.146465	0.277157	0.146465	0.277539	0.146521	0.277778	0.147202	0.277778	0.147681	0.277778	0.147939	0.277778	0.143939	-0.268882	0.28891	0.340909	0.250233	0.386364	0.234481	0.401515	0.219697	0.412637	0.219697	0.4142	0.216968	0.416667	0.218141	0.416667	0.219074	0.416667	0.219664	0.416667	0.227273	-0.161464	-0.0252525	0.365595			-0.343583	0.25	-0.327989	0.265152
0.222839	-0.0757576	0.186869	0.247747	0.160599	0.267677	0.162348	0.267677	0.156566	0.271726	0.156566	0.272104	0.156566	0.272377	0.156566	0.272752	0.156566	0.272999	0.156566	0.273133	0.128788	-0.273876	0.295455	0.335371	0.265152	0.376354	0.234848	0.401303	0.234848	0.403939	0.234848	0.405525	0.219697	0.415224	0.219697	0.415842	0.219697	0.416336	0.219697	0.416649	0.219287	-0.174242	-0.0151515	0.366045			-0.338384	0.253689	-0.318182	0.271713
0.221318	-0.0858586	0.18723	0.247475	0.166667	0.264122	0.166667	0.265137	0.1634	0.267677	0.16402	0.267677	0.164473	0.267677	0.165117	0.267677	0.165522	0.267677	0.16574	0.267677	0.113636	-0.277689	0.306078	0.325758	0.272201	0.371212	0.25	0.391935	0.238757	0.401515	0.241289	0.401515	0.234848	0.406548	0.234848	0.407176	0.234848	0.407674	0.234848	0.40801	0.217172	-0.177108	-0.00505051	0.366268			-0.328283	0.260938	-0.308081	0.278314
0.219351	-0.0959596	0.19697	0.239983	0.176768	0.257593	0.176768	0.258636	0.166667	0.265746	0.166667	0.266108	0.166667	0.266376	0.166667	0.266759	0.166667	0.266998	0.166667	0.267127	0.0998411	-0.280303	0.310606	0.321476	0.280303	0.365217	0.258243	0.386364	0.25	0.394565	0.25	0.396109	0.242891	0.401515	0.243884	0.401515	0.244664	0.401515	0.245215	0.401515	0.207197	-0.189394	0.00505051	0.366268			-0.322388	0.265152	-0.305002	0.280303
0.217172	-0.104857	0.200118	0.237374	0.176793	0.257576	0.178301	0.257576	0.176768	0.259245	0.176768	0.259611	0.176768	0.259887	0.176768	0.260293	0.176768	0.26054	0.176768	0.260671			0.321476	0.310606	0.291797	0.356061	0.265152	0.381672	0.262128	0.386364	0.264368	0.386364	0.25	0.39708	0.25	0.397697	0.25	0.398178	0.25	0.398527	0.207071	-0.189536	0.0151515	0.366045			-0.318182	0.268045	-0.29798	0.284705
0.216901	-0.106061	0.207071	0.231424	0.186869	0.250551	0.186869	0.251586	0.179172	0.257576	0.179696	0.257576	0.180092	0.257576	0.180677	0.257576	0.181033	0.257576	0.181219	0.257576			0.325758	0.306078	0.295455	0.353074	0.279361	0.371212	0.265152	0.384307	0.265152	0.385829	0.265152	0.386773	0.265152	0.387416	0.265152	0.387907	0.265152	0.388287	0.19697	-0.20021	0.0252525	0.365595			-0.308081	0.274953	-0.287879	0.290835
0.214156	-0.116162	0.211626	0.227273	0.190928	0.247475	0.192284	0.247475	0.186869	0.252173	0.186869	0.252532	0.186869	0.252809	0.186869	0.253221	0.186869	0.253471	0.186869	0.253601			0.335371	0.295455	0.309415	0.340909	0.280303	0.370509	0.280303	0.373233	0.280303	0.374807	0.265719	0.386364	0.266608	0.386364	0.267286	0.386364	0.267814	0.386364	0.192252	-0.204545	0.0353535	0.364919			-0.300018	0.280303	-0.27995	0.295455
0.210676	-0.126263	0.217172	0.222005	0.19697	0.2428	0.19697	0.243843	0.193035	0.247475	0.193502	0.247475	0.193862	0.247475	0.194401	0.247475	0.194734	0.247475	0.194902	0.247475			0.340909	0.28891	0.310606	0.339834	0.295455	0.358492	0.282898	0.371212	0.28491	0.371212	0.280303	0.375734	0.280303	0.376386	0.280303	0.376874	0.280303	0.377264	0.186869	-0.209433	0.0454545	0.364012			-0.29798	0.281614	-0.277778	0.29669
0.207071	-0.134623	0.222005	0.217172	0.203488	0.237374	0.204733	0.237374	0.19697	0.244414	0.19697	0.244775	0.19697	0.245054	0.19697	0.245474	0.19697	0.245734	0.19697	0.245864			0.347959	0.280303	0.325348	0.325758	0.298338	0.356061	0.295455	0.36125	0.295455	0.362834	0.286079	0.371212	0.286917	0.371212	0.287539	0.371212	0.288037	0.371212	0.176768	-0.217247	0.0555556	0.362875			-0.287879	0.288007	-0.267677	0.302322
0.206346	-0.136364	0.227273	0.211626	0.207071	0.234298	0.207071	0.235365	0.205397	0.237374	0.205824	0.237374	0.206156	0.237374	0.206655	0.237374	0.206971	0.237374	0.207071	0.237424			0.356061	0.269603	0.325758	0.325348	0.310606	0.345424	0.301588	0.356061	0.303451	0.356061	0.295455	0.363739	0.295455	0.364413	0.295455	0.364909	0.295455	0.365303	0.173043	-0.219697	0.0656566	0.361505			-0.277778	0.294084	-0.257576	0.307683
0.201307	-0.146465	0.231424	0.207071	0.214765	0.227273	0.215929	0.227273	0.207071	0.235931	0.207071	0.236299	0.207071	0.236585	0.207071	0.237016	0.207071	0.237288	0.207128	0.237374			0.35936	0.265152	0.339834	0.310606	0.315526	0.340909	0.310606	0.348215	0.310606	0.349832	0.3045	0.356061	0.305304	0.356061	0.305892	0.356061	0.306349	0.356061	0.166667	-0.224063	0.0757576	0.359899			-0.275443	0.295455	-0.251851	0.310606
0.19697	-0.153512	0.237374	0.200118	0.217172	0.224984	0.217172	0.22609	0.216536	0.227273	0.216936	0.227273	0.217172	0.227346	0.217172	0.227801	0.217172	0.228094	0.217172	0.228236			0.369717	0.25	0.340909	0.309415	0.325758	0.331157	0.31855	0.340909	0.320303	0.340909	0.310606	0.350734	0.310606	0.35144	0.310606	0.351954	0.310606	0.352349	0.156566	-0.229827	0.0858586	0.358052			-0.267677	0.299913	-0.247475	0.312817
0.195059	-0.156566	0.239983	0.19697	0.224984	0.217172	0.22609	0.217172	0.217172	0.226667	0.217172	0.227048	0.217248	0.227273	0.217723	0.227273	0.218029	0.227273	0.218177	0.227273			0.371212	0.24763	0.353074	0.295455	0.331157	0.325758	0.325758	0.334029	0.325758	0.335701	0.321272	0.340909	0.322046	0.340909	0.322608	0.340909	0.32303	0.340909	0.146465	-0.234421	0.0954678	0.356061			-0.257576	0.30547	-0.237374	0.317744
0.187546	-0.166667	0.247475	0.18723	0.227273	0.214765	0.227273	0.215929	0.226667	0.217172	0.227048	0.217172	0.227273	0.217248	0.227273	0.217723	0.227273	0.218029	0.227273	0.218177			0.379236	0.234848	0.356061	0.291797	0.340909	0.315526	0.334029	0.325758	0.335701	0.325758	0.325758	0.336623	0.325758	0.337364	0.325758	0.337902	0.325758	0.338304	0.145363	-0.234848	0.0959596	0.355964			-0.247725	0.310606	-0.227273	0.322399
0.186869	-0.167475	0.247747	0.186869	0.234298	0.207071	0.235365	0.207071	0.227273	0.216536	0.227273	0.216936	0.227346	0.217172	0.227801	0.217172	0.228094	0.217172	0.228236	0.217172			0.386364	0.222169	0.365217	0.280303	0.345424	0.310606	0.340909	0.31855	0.340909	0.320303	0.336623	0.325758	0.337364	0.325758	0.337902	0.325758	0.338304	0.325758	0.136364	-0.238773	0.106061	0.353767			-0.247475	0.310735	-0.219584	0.325758
0.17853	-0.176768	0.25488	0.176768	0.237374	0.203488	0.237374	0.204733	0.235931	0.207071	0.236299	0.207071	0.236585	0.207071	0.237016	0.207071	0.237288	0.207071	0.237374	0.207128			0.387762	0.219697	0.371212	0.272201	0.356061	0.298338	0.348215	0.310606	0.349832	0.310606	0.340909	0.321272	0.340909	0.322046	0.340909	0.322608	0.340909	0.32303	0.126263	-0.24235	0.116162	0.351314			-0.237374	0.315831	-0.217172	0.326813
0.176768	-0.17853	0.257576	0.172582	0.2428	0.19697	0.243843	0.19697	0.237374	0.205397	0.237374	0.205824	0.237374	0.206156	0.237374	0.206655	0.237374	0.206971	0.237424	0.207071			0.395671	0.204545	0.376354	0.265152	0.358492	0.295455	0.356061	0.301588	0.356061	0.303451	0.350734	0.310606	0.35144	0.310606	0.351954	0.310606	0.352349	0.310606	0.116162	-0.24522	0.126263	0.348593			-0.227273	0.320641	-0.207071	0.331069
0.167475	-0.186869	0.261363	0.166667	0.247475	0.190928	0.247475	0.192284	0.244414	0.19697	0.244775	0.19697	0.245054	0.19697	0.245474	0.19697	0.245734	0.19697	0.245864	0.19697			0.401515	0.191999	0.386364	0.250233	0.370509	0.280303	0.36125	0.295455	0.362834	0.295455	0.356061	0.3045	0.356061	0.305304	0.356061	0.305892	0.356061	0.306349	0.106061	-0.247509	0.136364	0.345589			-0.217172	0.325163	-0.19697	0.335064
0.166667	-0.187546	0.267229	0.156566	0.250551	0.186869	0.251586	0.186869	0.247475	0.193035	0.247475	0.193502	0.247475	0.193862	0.247475	0.194401	0.247475	0.194734	0.247475	0.194902			0.402757	0.189394	0.386519	0.25	0.371212	0.279361	0.371212	0.282898	0.371212	0.28491	0.363739	0.295455	0.364413	0.295455	0.364909	0.295455	0.365303	0.295455	0.0959596	-0.249314	0.146465	0.342288			-0.215791	0.325758	-0.186869	0.338803
0.156566	-0.195059	0.267677	0.15573	0.257576	0.176793	0.257576	0.178301	0.252173	0.186869	0.252532	0.186869	0.252809	0.186869	0.253221	0.186869	0.253471	0.186869	0.253601	0.186869			0.409379	0.174242	0.396009	0.234848	0.381672	0.265152	0.373233	0.280303	0.374807	0.280303	0.371212	0.286079	0.371212	0.286917	0.371212	0.287539	0.371212	0.288037	0.0911043	-0.25	0.150382	0.340909			-0.207071	0.329534	-0.180836	0.340909
0.153512	-0.19697	0.272691	0.146465	0.257593	0.176768	0.258636	0.176768	0.257576	0.179172	0.257576	0.179696	0.257576	0.180092	0.257576	0.180677	0.257576	0.181033	0.257576	0.181219			0.415177	0.159091	0.401515	0.22513	0.386364	0.258243	0.384307	0.265152	0.385829	0.265152	0.375734	0.280303	0.376386	0.280303	0.376874	0.280303	0.377264	0.280303			0.156566	0.338807			-0.19697	0.333651	-0.176768	0.342354
0.146465	-0.201307	0.277583	0.136364	0.264122	0.166667	0.265137	0.166667	0.259245	0.176768	0.259611	0.176768	0.259887	0.176768	0.260293	0.176768	0.26054	0.176768	0.260671	0.176768			0.416667	0.154728	0.404619	0.219697	0.391935	0.25	0.386364	0.262128	0.386364	0.264368	0.386364	0.265719	0.386364	0.266608	0.386364	0.267286	0.386364	0.267814			0.166667	0.335092			-0.186869	0.337499	-0.166667	0.345752
0.136364	-0.206346	0.277778	0.135926	0.267677	0.160599	0.267677	0.162348	0.265746	0.166667	0.266108	0.166667	0.266376	0.166667	0.266759	0.166667	0.266998	0.166667	0.267127	0.166667			0.420489	0.143939	0.412558	0.204545	0.401303	0.234848	0.394565	0.25	0.396109	0.25	0.386773	0.265152	0.387416	0.265152	0.387907	0.265152	0.388287	0.265152			0.176768	0.331041			-0.177275	0.340909	-0.156566	0.348913
0.134623	-0.207071	0.282178	0.126263	0.270046	0.156566	0.271087	0.156566	0.267677	0.1634	0.267677	0.16402	0.267677	0.164473	0.267677	0.165117	0.267677	0.165522	0.267677	0.16574			0.425184	0.128788	0.416667	0.195881	0.401515	0.234481	0.401515	0.238757	0.401515	0.241289	0.39708	0.25	0.397697	0.25	0.398178	0.25	0.398527	0.25			0.186869	0.326637			-0.176768	0.341093	-0.146465	0.35184
0.126263	-0.210676	0.286284	0.116162	0.275491	0.146465	0.276517	0.146465	0.271726	0.156566	0.272104	0.156566	0.272377	0.156566	0.272752	0.156566	0.272999	0.156566	0.273133	0.156566			0.429217	0.113636	0.419804	0.189394	0.41009	0.219697	0.403939	0.234848	0.405525	0.234848	0.401515	0.242891	0.401515	0.243884	0.401515	0.244664	0.401515	0.245215			0.188779	0.325758			-0.166667	0.344581	-0.136364	0.354538
0.116162	-0.214156	0.287879	0.111796	0.277778	0.141809	0.277778	0.143912	0.277157	0.146465	0.277539	0.146465	0.277778	0.146521	0.277778	0.147202	0.277778	0.147681	0.277778	0.147939			0.431818	0.102191	0.426449	0.174242	0.416667	0.207096	0.412637	0.219697	0.4142	0.219697	0.406548	0.234848	0.407176	0.234848	0.407674	0.234848	0.40801	0.234848			0.19697	0.322054			-0.156566	0.347821	-0.130188	0.356061
0.106061	-0.216901	0.290039	0.106061	0.280495	0.136364	0.281564	0.136364	0.277778	0.145213	0.277778	0.145985	0.277808	0.146465	0.278177	0.146465	0.278438	0.146465	0.278579	0.146465			0.432705	0.0984849	0.431818	0.160405	0.418018	0.204545	0.416667	0.211999	0.416667	0.215013	0.415224	0.219697	0.415842	0.219697	0.416336	0.219697	0.416649	0.219697			0.207071	0.317122			-0.146465	0.350817	-0.126263	0.357061
0.104857	-0.217172	0.293404	0.0959596	0.285083	0.126263	0.286145	0.126263	0.282236	0.136364	0.282642	0.136364	0.282921	0.136364	0.283266	0.136364	0.283532	0.136364	0.283674	0.136364			0.435785	0.0833333	0.432343	0.159091	0.425421	0.189394	0.42063	0.204545	0.422264	0.204545	0.416667	0.216968	0.416667	0.218141	0.416667	0.219074	0.416667	0.219664			0.217172	0.311774			-0.136364	0.353575	-0.116162	0.359439
		0.296302	0.0858586	0.287879	0.119434	0.287879	0.122054	0.286819	0.126263	0.287231	0.126263	0.287509	0.126263	0.287832	0.126263	0.287879	0.126783	0.287879	0.127105			0.438289	0.0681818	0.437822	0.143939	0.431818	0.174665	0.427983	0.189394	0.429611	0.189394	0.423333	0.204545	0.423981	0.204545	0.424495	0.204545	0.424813	0.204545			0.219277	0.310606			-0.126429	0.356061	-0.106061	0.361596
		0.29798	0.0791319	0.289253	0.116162	0.290369	0.116162	0.287879	0.123701	0.287879	0.124704	0.287879	0.125375	0.287879	0.126151	0.28812	0.126263	0.288269	0.126263			0.440247	0.0530303	0.442607	0.128788	0.432006	0.174242	0.431818	0.180641	0.431818	0.184395	0.43066	0.189394	0.43131	0.189394	0.431816	0.189394	0.431818	0.190071			0.227273	0.306177			-0.126263	0.356104	-0.0959596	0.36354
		0.298856	0.0757576	0.293098	0.106061	0.294212	0.106061	0.291079	0.116162	0.291519	0.116162	0.291814	0.116162	0.292132	0.116162	0.292432	0.116162	0.292581	0.116162			0.441688	0.0378788	0.446748	0.113636	0.438167	0.159091	0.43469	0.174242	0.436408	0.174242	0.431818	0.186775	0.431818	0.188249	0.431818	0.189388	0.432152	0.189394			0.237374	0.300173			-0.116162	0.358534	-0.0858586	0.365275
		0.301152	0.0656566	0.296467	0.0959596	0.297582	0.0959596	0.29492	0.106061	0.295365	0.106061	0.295665	0.106061	0.295963	0.106061	0.296274	0.106061	0.296423	0.106061			0.442633	0.0227273	0.44697	0.112704	0.443591	0.143939	0.440835	0.159091	0.44255	0.159091	0.437489	0.174242	0.43818	0.174242	0.438703	0.174242	0.43905	0.174242			0.244818	0.295455			-0.106061	0.360739	-0.0757576	0.366806
		0.303119	0.0555556	0.29798	0.0907584	0.29798	0.094605	0.29798	0.0968936	0.29798	0.0982588	0.29798	0.0991828	0.29798	0.100045	0.29798	0.100998	0.29798	0.101438			0.443101	0.00757576	0.450511	0.0984849	0.44697	0.133221	0.446255	0.143939	0.44697	0.146793	0.443602	0.159091	0.444297	0.159091	0.444811	0.159091	0.445173	0.159091			0.247475	0.293752			-0.0959596	0.362727	-0.0656566	0.368137
		0.304778	0.0454545	0.299454	0.0858586	0.300634	0.0858586	0.298301	0.0959596	0.298773	0.0959596	0.299096	0.0959596	0.299389	0.0959596	0.299724	0.0959596	0.299877	0.0959596			0.443101	-0.00757576	0.453676	0.0833333	0.448421	0.128788	0.44697	0.141704	0.448029	0.143939	0.44697	0.149719	0.44697	0.151682	0.44697	0.153113	0.44697	0.15414			0.257576	0.286983			-0.0858586	0.364504	-0.0555556	0.369271
		0.306139	0.0353535	0.302127	0.0757576	0.303312	0.0757576	0.301365	0.0858586	0.301837	0.0858586	0.302173	0.0858586	0.302446	0.0858586	0.302784	0.0858586	0.302933	0.0858586			0.442633	-0.0227273	0.45626	0.0681818	0.4528	0.113636	0.451257	0.128788	0.453072	0.128788	0.449115	0.143939	0.449855	0.143939	0.450391	0.143939	0.450792	0.143939			0.266863	0.280303			-0.0757576	0.366075	-0.0454545	0.370208
		0.307205	0.0252525	0.304444	0.0656566	0.305634	0.0656566	0.304032	0.0757576	0.304502	0.0757576	0.304852	0.0757576	0.305108	0.0757576	0.305448	0.0757576	0.305592	0.0757576			0.441688	-0.0378788	0.458295	0.0530303	0.456546	0.0984849	0.455642	0.113636	0.457452	0.113636	0.45413	0.128788	0.454876	0.128788	0.455403	0.128788	0.455819	0.128788			0.267677	0.279703			-0.0656566	0.367443	-0.0353535	0.370952
		0.307965	0.0151515	0.30643	0.0555556	0.307625	0.0555556	0.306342	0.0656566	0.306809	0.0656566	0.307173	0.0656566	0.307415	0.0656566	0.307758	0.0656566	0.307895	0.0656566			0.440247	-0.0530303	0.45981	0.0378788	0.459682	0.0833333	0.459394	0.0984849	0.461196	0.0984849	0.458492	0.113636	0.459244	0.113636	0.459764	0.113636	0.460189	0.113636			0.277778	0.272017			-0.0555556	0.36861	-0.0306105	0.371212
		0.308081	0.0123405	0.308081	0.0456007	0.308081	0.0528342	0.308081	0.0567904	0.308081	0.059185	0.308081	0.0610822	0.308081	0.0622802	0.308081	0.0640257	0.308081	0.0647139			0.438289	-0.0681818	0.460821	0.0227273	0.462121	0.0688876	0.462121	0.0853524	0.462121	0.0940564	0.462121	0.098917	0.462121	0.102031	0.462121	0.104138	0.462121	0.105859			0.286229	0.265152			-0.0454545	0.369578	-0.0252525	0.371522
		0.308398	0.00505051	0.308106	0.0454545	0.309379	0.0454545	0.308335	0.0555556	0.308828	0.0555556	0.309229	0.0555556	0.309471	0.0555556	0.309838	0.0555556	0.309975	0.0555556			0.435785	-0.0833333	0.461329	0.00757576	0.462247	0.0681818	0.462561	0.0833333	0.464469	0.0833333	0.462233	0.0984849	0.46304	0.0984849	0.463587	0.0984849	0.464036	0.0984849			0.287879	0.263764			-0.0353535	0.370348	-0.0151515	0.371909
		0.308398	-0.00505051	0.309563	0.0353535	0.310836	0.0353535	0.310102	0.0454545	0.310591	0.0454545	0.311006	0.0454545	0.311236	0.0454545	0.311606	0.0454545	0.311735	0.0454545			0.432705	-0.0984849	0.461329	-0.00757576	0.464399	0.0530303	0.46529	0.0681818	0.467182	0.0681818	0.465563	0.0833333	0.466378	0.0833333	0.466921	0.0833333	0.467353	0.0833333			0.29798	0.25501			-0.0252525	0.370922	-0.00505051	0.3721
		0.308081	-0.0123405	0.310695	0.0252525	0.311968	0.0252525	0.311544	0.0353535	0.31203	0.0353535	0.312457	0.0353535	0.312676	0.0353535	0.313051	0.0353535	0.313172	0.0353535			0.431818	-0.102191	0.460821	-0.0227273	0.466005	0.0378788	0.467444	0.0530303	0.469321	0.0530303	0.468284	0.0681818	0.469107	0.0681818	0.469649	0.0681818	0.470052	0.0681818			0.30352	0.25			-0.0175404	0.371212	0.00505051	0.3721
		0.307965	-0.0151515	0.311492	0.0151515	0.312761	0.0151515	0.312661	0.0252525	0.313142	0.0252525	0.31358	0.0252525	0.313792	0.0252525	0.314169	0.0252525	0.314283	0.0252525			0.429217	-0.113636	0.45981	-0.0378788	0.467082	0.0227273	0.469055	0.0378788	0.470918	0.0378788	0.470438	0.0530303	0.471268	0.0530303	0.471811	0.0530303	0.472179	0.0530303			0.308081	0.245685			-0.0151515	0.371307	0.0151515	0.371909
		0.307205	-0.0252525	0.31192	0.00505051	0.313183	0.00505051	0.313442	0.0151515	0.313919	0.0151515	0.314364	0.0151515	0.314569	0.0151515	0.31495	0.0151515	0.315057	0.0151515			0.425184	-0.128788	0.458295	-0.0530303	0.467628	0.00757576	0.470136	0.0227273	0.47199	0.0227273	0.472053	0.0378788	0.472891	0.0378788	0.473437	0.0378788	0.473769	0.0378788			0.318182	0.235796			-0.00505051	0.371508	0.0252525	0.371522
		0.306139	-0.0353535	0.31192	-0.00505051	0.313183	-0.00505051	0.313856	0.00505051	0.314329	0.00505051	0.314778	0.00505051	0.31498	0.00505051	0.315361	0.00505051	0.315465	0.00505051			0.420489	-0.143939	0.45626	-0.0681818	0.467628	-0.00757576	0.470685	0.00757576	0.472534	0.00757576	0.473142	0.0227273	0.473988	0.0227273	0.474537	0.0227273	0.474837	0.0227273			0.319143	0.234848			0.00505051	0.371508	0.0306105	0.371212
		0.304778	-0.0454545	0.311492	-0.0151515	0.312761	-0.0151515	0.313856	-0.00505051	0.314329	-0.00505051	0.314778	-0.00505051	0.31498	-0.00505051	0.315361	-0.00505051	0.315465	-0.00505051			0.416667	-0.154728	0.453676	-0.0833333	0.467082	-0.0227273	0.470685	-0.00757576	0.472534	-0.00757576	0.473698	0.00757576	0.474548	0.00757576	0.4751	0.00757576	0.475381	0.00757576			0.328283	0.225277			0.0151515	0.371307	0.0353535	0.370952
		0.303119	-0.0555556	0.310695	-0.0252525	0.311968	-0.0252525	0.313442	-0.0151515	0.313919	-0.0151515	0.314364	-0.0151515	0.314569	-0.0151515	0.31495	-0.0151515	0.315057	-0.0151515			0.415177	-0.159091	0.450511	-0.0984849	0.466005	-0.0378788	0.470136	-0.0227273	0.47199	-0.0227273	0.473698	-0.00757576	0.474548	-0.00757576	0.4751	-0.00757576	0.475381	-0.00757576			0.333518	0.219697			0.0175404	0.371212	0.0454545	0.370208
		0.301152	-0.0656566	0.309563	-0.0353535	0.310836	-0.0353535	0.312661	-0.0252525	0.313142	-0.0252525	0.31358	-0.0252525	0.313792	-0.0252525	0.314169	-0.0252525	0.314283	-0.0252525			0.409379	-0.174242	0.44697	-0.112704	0.464399	-0.0530303	0.469055	-0.0378788	0.470918	-0.0378788	0.473142	-0.0227273	0.473988	-0.0227273	0.474537	-0.0227273	0.474837	-0.0227273			0.338384	0.214122			0.0252525	0.370922	0.0555556	0.369271
		0.298856	-0.0757576	0.308106	-0.0454545	0.309379	-0.0454545	0.311544	-0.0353535	0.31203	-0.0353535	0.312457	-0.0353535	0.312676	-0.0353535	0.313051	-0.0353535	0.313172	-0.0353535			0.402757	-0.189394	0.446748	-0.113636	0.462247	-0.0681818	0.467444	-0.0530303	0.469321	-0.0530303	0.472053	-0.0378788	0.472891	-0.0378788	0.473437	-0.0378788	0.473769	-0.0378788			0.346732	0.204545			0.0353535	0.370348	0.0656566	0.368137
		0.29798	-0.0791319	0.308081	-0.0456007	0.308081	-0.0528342	0.310102	-0.0454545	0.310591	-0.0454545	0.311006	-0.0454545	0.311236	-0.0454545	0.311606	-0.0454545	0.311735	-0.0454545			0.401515	-0.191999	0.442607	-0.128788	0.462121	-0.0688876	0.46529	-0.0681818	0.467182	-0.0681818	0.470438	-0.0530303	0.471268	-0.0530303	0.471811	-0.0530303	0.472179	-0.0530303			0.348485	0.20237			0.0454545	0.369578	0.0757576	0.366806
		0.296302	-0.0858586	0.30643	-0.0555556	0.307625	-0.0555556	0.308335	-0.0555556	0.308828	-0.0555556	0.309229	-0.0555556	0.309471	-0.0555556	0.309838	-0.0555556	0.309975	-0.0555556			0.395671	-0.204545	0.437822	-0.143939	0.459682	-0.0833333	0.462561	-0.0833333	0.464469	-0.0833333	0.468284	-0.0681818	0.469107	-0.0681818	0.469649	-0.0681818	0.470052	-0.0681818			0.358586	0.190098			0.0555556	0.36861	0.0858586	0.365275
		0.293404	-0.0959596	0.304444	-0.0656566	0.305634	-0.0656566	0.308081	-0.0567904	0.308081	-0.059185	0.308081	-0.0610822	0.308081	-0.0622802	0.308081	-0.0640257	0.308081	-0.0647139			0.387762	-0.219697	0.432343	-0.159091	0.456546	-0.0984849	0.462121	-0.0853524	0.462121	-0.0940564	0.465563	-0.0833333	0.466378	-0.0833333	0.466921	-0.0833333	0.467353	-0.0833333			0.359189	0.189394			0.0656566	0.367443	0.0959596	0.36354
		0.290039	-0.106061	0.302127	-0.0757576	0.303312	-0.0757576	0.306342	-0.0656566	0.306809	-0.0656566	0.307173	-0.0656566	0.307415	-0.0656566	0.307758	-0.0656566	0.307895	-0.0656566			0.386364	-0.222169	0.431818	-0.160405	0.4528	-0.113636	0.459394	-0.0984849	0.461196	-0.0984849	0.462233	-0.0984849	0.46304	-0.0984849	0.463587	-0.0984849	0.464036	-0.0984849			0.368687	0.177432			0.0757576	0.366075	0.106061	0.361596
		0.287879	-0.111796	0.299454	-0.0858586	0.300634	-0.0858586	0.304032	-0.0757576	0.304502	-0.0757576	0.304852	-0.0757576	0.305108	-0.0757576	0.305448	-0.0757576	0.305592	-0.0757576			0.379236	-0.234848	0.426449	-0.174242	0.448421	-0.128788	0.455642	-0.113636	0.457452	-0.113636	0.462121	-0.098917	0.462121	-0.102031	0.462121	-0.104138	0.462121	-0.105859			0.371372	0.174242			0.0858586	0.364504	0.116162	0.359439
		0.286284	-0.116162	0.29798	-0.0907584	0.29798	-0.094605	0.301365	-0.0858586	0.301837	-0.0858586	0.302173	-0.0858586	0.302446	-0.0858586	0.302784	-0.0858586	0.302933	-0.0858586			0.371212	-0.24763	0.419804	-0.189394	0.44697	-0.133221	0.451257	-0.128788	0.453072	-0.128788	0.458492	-0.113636	0.459244	-0.113636	0.459764	-0.113636	0.460189	-0.113636			0.378788	0.164585			0.0959596	0.362727	0.126263	0.357061
		0.282178	-0.126263	0.296467	-0.0959596	0.297582	-0.0959596	0.298301	-0.0959596	0.298773	-0.0959596	0.299096	-0.0959596	0.299389	-0.0959596	0.299724	-0.0959596	0.299877	-0.0959596			0.369717	-0.25	0.416667	-0.195881	0.443591	-0.143939	0.44697	-0.141704	0.448029	-0.143939	0.45413	-0.128788	0.454876	-0.128788	0.455403	-0.128788	0.455819	-0.128788			0.383367	0.159091			0.106061	0.360739	0.130188	0.356061
		0.277778	-0.135926	0.293098	-0.106061	0.294212	-0.106061	0.29798	-0.0968936	0.29798	-0.0982588	0.29798	-0.0991828	0.29798	-0.100045	0.29798	-0.100998	0.29798	-0.101438			0.35936	-0.265152	0.412558	-0.204545	0.438167	-0.159091	0.446255	-0.143939	0.44697	-0.146793	0.449115	-0.143939	0.449855	-0.143939	0.450391	-0.143939	0.450792	-0.143939			0.388889	0.151584			0.116162	0.358534	0.136364	0.354538
		0.277583	-0.136364	0.289253	-0.116162	0.290369	-0.116162	0.29492	-0.106061	0.295365	-0.106061	0.295665	-0.106061	0.295963	-0.106061	0.296274	-0.106061	0.296423	-0.106061			0.356061	-0.269603	0.404619	-0.219697	0.432006	-0.174242	0.440835	-0.159091	0.44255	-0.159091	0.44697	-0.149719	0.44697	-0.151682	0.44697	-0.153113	0.44697	-0.15414			0.395092	0.143939			0.126263	0.356104	0.146465	0.35184
		0.272691	-0.146465	0.287879	-0.119434	0.287879	-0.122054	0.291079	-0.116162	0.291519	-0.116162	0.291814	-0.116162	0.292132	-0.116162	0.292432	-0.116162	0.292581	-0.116162			0.347959	-0.280303	0.401515	-0.22513	0.431818	-0.174665	0.43469	-0.174242	0.436408	-0.174242	0.443602	-0.159091	0.444297	-0.159091	0.444811	-0.159091	0.445173	-0.159091			0.39899	0.138344			0.126429	0.356061	0.156566	0.348913
		0.267677	-0.15573	0.285083	-0.126263	0.286145	-0.126263	0.287879	-0.123701	0.287879	-0.124704	0.287879	-0.125375	0.287879	-0.126151	0.28812	-0.126263	0.288269	-0.126263			0.340909	-0.28891	0.396009	-0.234848	0.425421	-0.189394	0.431818	-0.180641	0.431818	-0.184395	0.437489	-0.174242	0.43818	-0.174242	0.438703	-0.174242	0.43905	-0.174242			0.406514	0.128788			0.136364	0.353575	0.166667	0.345752
		0.267229	-0.156566	0.280495	-0.136364	0.281564	-0.136364	0.286819	-0.126263	0.287231	-0.126263	0.287509	-0.126263	0.287832	-0.126263	0.287879	-0.126783	0.287879	-0.127105			0.335371	-0.295455	0.386519	-0.25	0.418018	-0.204545	0.427983	-0.189394	0.429611	-0.189394	0.431818	-0.186775	0.431818	-0.188249	0.431818	-0.189388	0.432152	-0.189394			0.409091	0.124975			0.146465	0.350817	0.176768	0.342354
		0.261363	-0.166667	0.277778	-0.141809	0.277778	-0.143912	0.282236	-0.136364	0.282642	-0.136364	0.282921	-0.136364	0.283266	-0.136364	0.283532	-0.136364	0.283674	-0.136364			0.325758	-0.306078	0.386364	-0.250233	0.416667	-0.207096	0.42063	-0.204545	0.422264	-0.204545	0.43066	-0.189394	0.43131	-0.189394	0.431816	-0.189394	0.431818	-0.190071			0.418103	0.113636			0.156566	0.347821	0.180836	0.340909
		0.257576	-0.172582	0.275491	-0.146465	0.276517	-0.146465	0.277778	-0.145213	0.277778	-0.145985	0.277808	-0.146465	0.278177	-0.146465	0.278438	-0.146465	0.278579	-0.146465			0.321476	-0.310606	0.376354	-0.265152	0.41009	-0.219697	0.416667	-0.211999	0.416667	-0.215013	0.423333	-0.204545	0.423981	-0.204545	0.424495	-0.204545	0.424813	-0.204545			0.419192	0.112119			0.166667	0.344581	0.186869	0.338803
		0.25488	-0.176768	0.270046	-0.156566	0.271087	-0.156566	0.277157	-0.146465	0.277539	-0.146465	0.277778	-0.146521	0.277778	-0.147202	0.277778	-0.147681	0.277778	-0.147939			0.310606	-0.321476	0.371212	-0.272201	0.401515	-0.234481	0.412637	-0.219697	0.4142	-0.219697	0.416667	-0.216968	0.416667	-0.218141	0.416667	-0.219074	0.416667	-0.219664			0.429293	0.10012			0.176768	0.341093	0.19697	0.335064
		0.247747	-0.186869	0.267677	-0.160599	0.267677	-0.162348	0.271726	-0.156566	0.272104	-0.156566	0.272377	-0.156566	0.272752	-0.156566	0.272999	-0.156566	0.273133	-0.156566			0.306078	-0.325758	0.365217	-0.280303	0.401303	-0.234848	0.403939	-0.234848	0.405525	-0.234848	0.415224	-0.219697	0.415842	-0.219697	0.416336	-0.219697	0.416649	-0.219697			0.430869	0.0984849			0.177275	0.340909	0.207071	0.331069
		0.247475	-0.18723	0.264122	-0.166667	0.265137	-0.166667	0.267677	-0.1634	0.267677	-0.16402	0.267677	-0.164473	0.267677	-0.165117	0.267677	-0.165522	0.267677	-0.16574			0.295455	-0.335371	0.356061	-0.291797	0.391935	-0.25	0.401515	-0.238757	0.401515	-0.241289	0.406548	-0.234848	0.407176	-0.234848	0.407674	-0.234848	0.40801	-0.234848			0.439394	0.0883506			0.186869	0.337499	0.217172	0.326813
		0.239983	-0.19697	0.257593	-0.176768	0.258636	-0.176768	0.265746	-0.166667	0.266108	-0.166667	0.266376	-0.166667	0.266759	-0.166667	0.266998	-0.166667	0.267127	-0.166667			0.28891	-0.340909	0.353074	-0.295455	0.386364	-0.258243	0.394565	-0.25	0.396109	-0.25	0.401515	-0.242891	0.401515	-0.243884	0.401515	-0.244664	0.401515	-0.245215			0.443967	0.0833333			0.19697	0.333651	0.219584	0.325758
		0.237374	-0.200118	0.257576	-0.176793	0.257576	-0.178301	0.259245	-0.176768	0.259611	-0.176768	0.259887	-0.176768	0.260293	-0.176768	0.26054	-0.176768	0.260671	-0.176768			0.280303	-0.347959	0.340909	-0.309415	0.381672	-0.265152	0.386364	-0.262128	0.386364	-0.264368	0.39708	-0.25	0.397697	-0.25	0.398178	-0.25	0.398527	-0.25			0.449495	0.0759316			0.207071	0.329534	0.227273	0.322399
		0.231424	-0.207071	0.250551	-0.186869	0.251586	-0.186869	0.257576	-0.179172	0.257576	-0.179696	0.257576	-0.180092	0.257576	-0.180677	0.257576	-0.181033	0.257576	-0.181219			0.269603	-0.356061	0.339834	-0.310606	0.371212	-0.279361	0.384307	-0.265152	0.385829	-0.265152	0.386773	-0.265152	0.387416	-0.265152	0.387907	-0.265152	0.388287	-0.265152			0.455466	0.0681818			0.215791	0.325758	0.237374	0.317744
		0.227273	-0.211626	0.247475	-0.190928	0.247475	-0.192284	0.252173	-0.186869	0.252532	-0.186869	0.252809	-0.186869	0.253221	-0.186869	0.253471	-0.186869	0.253601	-0.186869			0.265152	-0.35936	0.325758	-0.325348	0.370509	-0.280303	0.373233	-0.280303	0.374807	-0.280303	0.386364	-0.265719	0.386364	-0.266608	0.386364	-0.267286	0.386364	-0.267814			0.459596	0.0613246			0.217172	0.325163	0.247475	0.312817
		0.222005	-0.217172	0.2428	-0.19697	0.243843	-0.19697	0.247475	-0.193035	0.247475	-0.193502	0.247475	-0.193862	0.247475	-0.194401	0.247475	-0.194734	0.247475	-0.194902			0.25	-0.369717	0.325348	-0.325758	0.358492	-0.295455	0.371212	-0.282898	0.371212	-0.28491	0.375734	-0.280303	0.376386	-0.280303	0.376874	-0.280303	0.377264	-0.280303			0.464524	0.0530303			0.227273	0.320641	0.251851	0.310606
		0.217172	-0.222005	0.237374	-0.203488	0.237374	-0.204733	0.244414	-0.19697	0.244775	-0.19697	0.245054	-0.19697	0.245474	-0.19697	0.245734	-0.19697	0.245864	-0.19697			0.24763	-0.371212	0.310606	-0.339834	0.356061	-0.298338	0.36125	-0.295455	0.362834	-0.295455	0.371212	-0.286079	0.371212	-0.286917	0.371212	-0.287539	0.371212	-0.288037			0.469697	0.0417049			0.237374	0.315831	0.257576	0.307683
		0.211626	-0.227273	0.234298	-0.207071	0.235365	-0.207071	0.237374	-0.205397	0.237374	-0.205824	0.237374	-0.206156	0.237374	-0.206655	0.237374	-0.206971	0.237424	-0.207071			0.234848	-0.379236	0.309415	-0.340909	0.345424	-0.310606	0.356061	-0.301588	0.356061	-0.303451	0.363739	-0.295455	0.364413	-0.295455	0.364909	-0.295455	0.365303	-0.295455			0.471361	0.0378788			0.247475	0.310735	0.267677	0.302322
		0.207071	-0.231424	0.227273	-0.214765	0.227273	-0.215929	0.235931	-0.207071	0.236299	-0.207071	0.236585	-0.207071	0.237016	-0.207071	0.237288	-0.207071	0.237374	-0.207128			0.222169	-0.386364	0.295455	-0.353074	0.340909	-0.315526	0.348215	-0.310606	0.349832	-0.310606	0.356061	-0.3045	0.356061	-0.305304	0.356061	-0.305892	0.356061	-0.306349			0.476252	0.0227273			0.247725	0.310606	0.277778	0.29669
		0.200118	-0.237374	0.224984	-0.217172	0.22609	-0.217172	0.227273	-0.216536	0.227273	-0.216936	0.227346	-0.217172	0.227801	-0.217172	0.228094	-0.217172	0.228236	-0.217172			0.219697	-0.387762	0.291797	-0.356061	0.331157	-0.325758	0.340909	-0.31855	0.340909	-0.320303	0.350734	-0.310606	0.35144	-0.310606	0.351954	-0.310606	0.352349	-0.310606			0.479151	0.00757576			0.257576	0.30547	0.27995	0.295455
		0.19697	-0.239983	0.217172	-0.224984	0.217172	-0.22609	0.226667	-0.217172	0.227048	-0.217172	0.227273	-0.217248	0.227273	-0.217723	0.227273	-0.218029	0.227273	-0.218177			0.204545	-0.395671	0.280303	-0.365217	0.325758	-0.331157	0.334029	-0.325758	0.335701	-0.325758	0.340909	-0.321272	0.340909	-0.322046	0.340909	-0.322608	0.340909	-0.32303			0.479151	-0.00757576			0.267677	0.299913	0.287879	0.290835
		0.18723	-0.247475	0.214765	-0.227273	0.215929	-0.227273	0.217172	-0.226667	0.217172	-0.227048	0.217248	-0.227273	0.217723	-0.227273	0.218029	-0.227273	0.218177	-0.227273			0.191999	-0.401515	0.272201	-0.371212	0.315526	-0.340909	0.325758	-0.334029	0.325758	-0.335701	0.336623	-0.325758	0.337364	-0.325758	0.337902	-0.325758	0.338304	-0.325758			0.476252	-0.0227273			0.275443	0.295455	0.29798	0.284705
		0.186869	-0.247747	0.207071	-0.234298	0.207071	-0.235365	0.216536	-0.227273	0.216936	-0.227273	0.217172	-0.227346	0.217172	-0.227801	0.217172	-0.228094	0.217172	-0.228236			0.189394	-0.402757	0.265152	-0.376354	0.310606	-0.345424	0.31855	-0.340909	0.320303	-0.340909	0.325758	-0.336623	0.325758	-0.337364	0.325758	-0.337902	0.325758	-0.338304			0.471361	-0.0378788			0.277778	0.294084	0.305002	0.280303
		0.176768	-0.25488	0.203488	-0.237374	0.204733	-0.237374	0.207071	-0.235931	0.207071	-0.236299	0.207071	-0.236585	0.207071	-0.237016	0.207071	-0.237288	0.207128	-0.237374			0.174242	-0.409379	0.250233	-0.386364	0.298338	-0.356061	0.310606	-0.348215	0.310606	-0.349832	0.321272	-0.340909	0.322046	-0.340909	0.322608	-0.340909	0.32303	-0.340909			0.469697	-0.0417049			0.287879	0.288007	0.308081	0.278314
		0.172582	-0.257576	0.19697	-0.2428	0.19697	-0.243843	0.205397	-0.237374	0.205824	-0.237374	0.206156	-0.237374	0.206655	-0.237374	0.206971	-0.237374	0.207071	-0.237424			0.159091	-0.415177	0.25	-0.386519	0.295455	-0.358492	0.301588	-0.356061	0.303451	-0.356061	0.310606	-0.350734	0.310606	-0.35144	0.310606	-0.351954	0.310606	-0.352349			0.464524	-0.0530303			0.29798	0.281614	0.318182	0.271713
		0.166667	-0.261363	0.190928	-0.247475	0.192284	-0.247475	0.19697	-0.244414	0.19697	-0.244775	0.19697	-0.245054	0.19697	-0.245474	0.19697	-0.245734	0.19697	-0.245864			0.154728	-0.416667	0.234848	-0.396009	0.280303	-0.370509	0.295455	-0.36125	0.295455	-0.362834	0.3045	-0.356061	0.305304	-0.356061	0.305892	-0.356061	0.306349	-0.356061			0.459596	-0.0613246			0.300018	0.280303	0.327989	0.265152
		0.156566	-0.267229	0.186869	-0.250551	0.186869	-0.251586	0.193035	-0.247475	0.193502	-0.247475	0.193862	-0.247475	0.194401	-0.247475	0.194734	-0.247475	0.194902	-0.247475			0.143939	-0.420489	0.22513	-0.401515	0.279361	-0.371212	0.282898	-0.371212	0.28491	-0.371212	0.295455	-0.363739	0.295455	-0.364413	0.295455	-0.364909	0.295455	-0.365303			0.455466	-0.0681818			0.308081	0.274953	0.328283	0.264947
		0.15573	-0.267677	0.176793	-0.257576	0.178301	-0.257576	0.186869	-0.252173	0.186869	-0.252532	0.186869	-0.252809	0.186869	-0.253221	0.186869	-0.253471	0.186869	-0.253601			0.128788	-0.425184	0.219697	-0.404619	0.265152	-0.381672	0.280303	-0.373233	0.280303	-0.374807	0.286079	-0.371212	0.286917	-0.371212	0.287539	-0.371212	0.288037	-0.371212			0.449495	-0.0759316			0.318182	0.268045	0.338384	0.258044
		0.146465	-0.272691	0.176768	-0.257593	0.176768	-0.258636	0.179172	-0.257576	0.179696	-0.257576	0.180092	-0.257576	0.180677	-0.257576	0.181033	-0.257576	0.181219	-0.257576			0.113636	-0.429217	0.204545	-0.412558	0.258243	-0.386364	0.265152	-0.384307	0.265152	-0.385829	0.280303	-0.375734	0.280303	-0.376386	0.280303	-0.376874	0.280303	-0.377264			0.443967	-0.0833333			0.322388	0.265152	0.348485	0.251111
		0.136364	-0.277583	0.166667	-0.264122	0.166667	-0.265137	0.176768	-0.259245	0.176768	-0.259611	0.176768	-0.259887	0.176768	-0.260293	0.176768	-0.26054	0.176768	-0.260671			0.102191	-0.431818	0.195881	-0.416667	0.25	-0.391935	0.262128	-0.386364	0.264368	-0.386364	0.265719	-0.386364	0.266608	-0.386364	0.267286	-0.386364	0.267814	-0.386364			0.439394	-0.0883506			0.328283	0.260938	0.350166	0.25
		0.135926	-0.277778	0.160599	-0.267677	0.162348	-0.267677	0.166667	-0.265746	0.166667	-0.266108	0.166667	-0.266376	0.166667	-0.266759	0.166667	-0.266998	0.166667	-0.267127					0.189394	-0.419804	0.234848	-0.401303	0.25	-0.394565	0.25	-0.396109	0.265152	-0.386773	0.265152	-0.387416	0.265152	-0.387907	0.265152	-0.388287			0.430869	-0.0984849			0.338384	0.253689	0.358586	0.244139
		0.126263	-0.282178	0.156566	-0.270046	0.156566	-0.271087	0.1634	-0.267677	0.16402	-0.267677	0.164473	-0.267677	0.165117	-0.267677	0.165522	-0.267677	0.16574	-0.267677					0.174242	-0.426449	0.234481	-0.401515	0.238757	-0.401515	0.241289	-0.401515	0.25	-0.39708	0.25	-0.397697	0.25	-0.398178	0.25	-0.398527			0.429293	-0.10012			0.343583	0.25	0.368687	0.237299
		0.116162	-0.286284	0.146465	-0.275491	0.146465	-0.276517	0.156566	-0.271726	0.156566	-0.272104	0.156566	-0.272377	0.156566	-0.272752	0.156566	-0.272999	0.156566	-0.273133					0.160405	-0.431818	0.219697	-0.41009	0.234848	-0.403939	0.234848	-0.405525	0.242891	-0.401515	0.243884	-0.401515	0.244664	-0.401515	0.245215	-0.401515			0.419192	-0.112119			0.348485	0.246343	0.372531	0.234848
		0.111796	-0.287879	0.141809	-0.277778	0.143912	-0.277778	0.146465	-0.277157	0.146465	-0.277539	0.146521	-0.277778	0.147202	-0.277778	0.147681	-0.277778	0.147939	-0.277778					0.159091	-0.432343	0.207096	-0.416667	0.219697	-0.412637	0.219697	-0.4142	0.234848	-0.406548	0.234848	-0.407176	0.234848	-0.407674	0.234848	-0.40801			0.418103	-0.113636			0.358586	0.238973	0.378788	0.2306
		0.106061	-0.290039	0.136364	-0.280495	0.136364	-0.281564	0.145213	-0.277778	0.145985	-0.277778	0.146465	-0.277808	0.146465	-0.278177	0.146465	-0.278438	0.146465	-0.278579					0.143939	-0.437822	0.204545	-0.418018	0.211999	-0.416667	0.215013	-0.416667	0.219697	-0.415224	0.219697	-0.415842	0.219697	-0.416336	0.219697	-0.416649			0.409091	-0.124975			0.364436	0.234848	0.388889	0.224206
		0.0959596	-0.293404	0.126263	-0.285083	0.126263	-0.286145	0.136364	-0.282236	0.136364	-0.282642	0.136364	-0.282921	0.136364	-0.283266	0.136364	-0.283532	0.136364	-0.283674					0.128788	-0.442607	0.189394	-0.425421	0.204545	-0.42063	0.204545	-0.422264	0.216968	-0.416667	0.218141	-0.416667	0.219074	-0.416667	0.219664	-0.416667			0.406514	-0.128788			0.368687	0.231661	0.396732	0.219697
		0.0858586	-0.296302	0.119434	-0.287879	0.122054	-0.287879	0.126263	-0.286819	0.126263	-0.287231	0.126263	-0.287509	0.126263	-0.287832	0.126783	-0.287879	0.127105	-0.287879					0.113636	-0.446748	0.174665	-0.431818	0.189394	-0.427983	0.189394	-0.429611	0.204545	-0.423333	0.204545	-0.423981	0.204545	-0.424495	0.204545	-0.424813			0.39899	-0.138344			0.378788	0.224478	0.39899	0.218315
		0.0791319	-0.29798	0.116162	-0.289253	0.116162	-0.290369	0.123701	-0.287879	0.124704	-0.287879	0.125375	-0.287879	0.126151	-0.287879	0.126263	-0.28812	0.126263	-0.288269					0.112704	-0.44697	0.174242	-0.432006	0.180641	-0.431818	0.184395	-0.431818	0.189394	-0.43066	0.189394	-0.43131	0.189394	-0.431816	0.190071	-0.431818			0.395092	-0.143939			0.385955	0.219697	0.409091	0.213038
		0.0757576	-0.298856	0.106061	-0.293098	0.106061	-0.294212	0.116162	-0.291079	0.116162	-0.291519	0.116162	-0.291814	0.116162	-0.292132	0.116162	-0.292432	0.116162	-0.292581							0.159091	-0.438167	0.174242	-0.43469	0.174242	-0.436408	0.186775	-0.431818	0.188249	-0.431818	0.189388	-0.431818	0.189394	-0.432152			0.388889	-0.151584			0.388889	0.21761	0.419192	0.208576
		0.0656566	-0.301152	0.0959596	-0.296467	0.0959596	-0.297582	0.106061	-0.29492	0.106061	-0.295365	0.106061	-0.295665	0.106061	-0.295963	0.106061	-0.296274	0.106061	-0.296423							0.143939	-0.443591	0.159091	-0.440835	0.159091	-0.44255	0.174242	-0.437489	0.174242	-0.43818	0.174242	-0.438703	0.174242	-0.43905			0.383367	-0.159091			0.39899	0.211154	0.429293	0.20476
		0.0555556	-0.303119	0.0907584	-0.29798	0.094605	-0.29798	0.0968936	-0.29798	0.0982588	-0.29798	0.0991828	-0.29798	0.100045	-0.29798	0.100998	-0.29798	0.101438	-0.29798							0.133221	-0.44697	0.143939	-0.446255	0.146793	-0.44697	0.159091	-0.443602	0.159091	-0.444297	0.159091	-0.444811	0.159091	-0.445173			0.378788	-0.164585			0.409091	0.20556	0.429947	0.204545
		0.0454545	-0.304778	0.0858586	-0.299454	0.0858586	-0.300634	0.0959596	-0.298301	0.0959596	-0.298773	0.0959596	-0.299096	0.0959596	-0.299389	0.0959596	-0.299724	0.0959596	-0.299877							0.128788	-0.448421	0.141704	-0.44697	0.143939	-0.448029	0.149719	-0.44697	0.151682	-0.44697	0.153113	-0.44697	0.15414	-0.44697			0.371372	-0.174242			0.411282	0.204545	0.439394	0.201292
		0.0353535	-0.306139	0.0757576	-0.302127	0.0757576	-0.303312	0.0858586	-0.301365	0.0858586	-0.301837	0.0858586	-0.302173	0.0858586	-0.302446	0.0858586	-0.302784	0.0858586	-0.302933							0.113636	-0.4528	0.128788	-0.451257	0.128788	-0.453072	0.143939	-0.449115	0.143939	-0.449855	0.143939	-0.450391	0.143939	-0.450792			0.368687	-0.177432			0.419192	0.200758	0.449495	0.198083
		0.0252525	-0.307205	0.0656566	-0.304444	0.0656566	-0.305634	0.0757576	-0.304032	0.0757576	-0.304502	0.0757576	-0.304852	0.0757576	-0.305108	0.0757576	-0.305448	0.0757576	-0.305592							0.0984849	-0.456546	0.113636	-0.455642	0.113636	-0.457452	0.128788	-0.45413	0.128788	-0.454876	0.128788	-0.455403	0.128788	-0.455819			0.359189	-0.189394			0.429293	0.196542	0.459596	0.194963
		0.0151515	-0.307965	0.0555556	-0.30643	0.0555556	-0.307625	0.0656566	-0.306342	0.0656566	-0.306809	0.0656566	-0.307173	0.0656566	-0.307415	0.0656566	-0.307758	0.0656566	-0.307895							0.0833333	-0.459682	0.0984849	-0.459394	0.0984849	-0.461196	0.113636	-0.458492	0.113636	-0.459244	0.113636	-0.459764	0.113636	-0.460189			0.358586	-0.190098			0.439394	0.192777	0.469697	0.191734
		0.0123405	-0.308081	0.0456007	-0.308081	0.0528342	-0.308081	0.0567904	-0.308081	0.059185	-0.308081	0.0610822	-0.308081	0.0622802	-0.308081	0.0640257	-0.308081	0.0647139	-0.308081							0.0688876	-0.462121	0.0853524	-0.462121	0.0940564	-0.462121	0.098917	-0.462121	0.102031	-0.462121	0.104138	-0.462121	0.105859	-0.462121			0.348485	-0.20237			0.449221	0.189394	0.476364	0.189394
																																										0.346732	-0.204545			0.449495	0.189293	0.479798	0.188088
																																										0.338384	-0.214122			0.459596	0.185722	0.489899	0.183602
																																										0.333518	-0.219697			0.469697	0.181995	0.5	0.178099
																																										0.328283	-0.225277			0.479798	0.177843
																																										0.319143	-0.234848			0.487278	0.174242
																																										0.318182	-0.235796			0.489899	0.172885
																																										0.308081	-0.245685			0.5	0.166684
																																										0.30352	-0.25
																																										0.29798	-0.25501
																																										0.287879	-0.263764
																																										0.286229	-0.265152
																																										0.277778	-0.272017
																																										0.267677	-0.279703
																																										0.266863	-0.280303
																																										0.257576	-0.286983
																																										0.247475	-0.293752
																																										0.244818	-0.295455
																																										0.237374	-0.300173
																																										0.227273	-0.306177
																																										0.219277	-0.310606
																																										0.217172	-0.311774
																																										0.207071	-0.317122
																																										0.19697	-0.322054
																																										0.188779	-0.325758
																																										0.186869	-0.326637
																																										0.176768	-0.331041
																																										0.166667	-0.335092
																																										0.156566	-0.338807
																																										0.150382	-0.340909
																																										0.146465	-0.342288
																																										0.136364	-0.345589
																																										0.126263	-0.348593
																																										0.116162	-0.351314
																																										0.106061	-0.353767
																																										0.0959596	-0.355964
																																										0.0954678	-0.356061
[truncated: 30 more columns]
