# Supplementary material for: Optimization Analysis of the Position of Thermometers Buried in Concrete Pouring Block Embedded with Cooling Pipes
Source: Hindawi journal article supplement (doi:10.1155/2019/5256839), 2019-01-01
Supplement: f3 [file 5256839.f3.xlsx]

## Sheet: Coordinate in Fig.10
Four water-pipe spacings
1.0 m × 1.0 m		1.5 m × 1.5 m		1.0 m × 1.5 m		2.0 m × 1.5 m
x	y	x	y	x	y	x	y
0.307734	-0.1	0.493328	-0.1	0.42105	-0.26	0.542915	-0.1
0.308917	-0.095	0.493881	-0.095	0.442703	-0.255	0.543296	-0.095
0.310089	-0.09	0.494431	-0.09	0.463534	-0.25	0.543677	-0.09
0.311248	-0.085	0.494977	-0.085	0.48359	-0.245	0.544056	-0.085
0.312396	-0.08	0.495521	-0.08	0.330586	-0.3	0.544434	-0.08
0.313532	-0.075	0.496063	-0.075	0.341612	-0.295	0.544811	-0.075
0.314656	-0.07	0.496601	-0.07	0.352087	-0.29	0.545187	-0.07
0.31577	-0.065	0.497137	-0.065	0.362051	-0.285	0.545562	-0.065
0.316872	-0.06	0.49767	-0.06	0.371539	-0.28	0.545936	-0.06
0.317964	-0.055	0.498201	-0.055	0.380585	-0.275	0.546309	-0.055
0.319045	-0.05	0.498729	-0.05	0.389217	-0.27	0.546681	-0.05
0.320116	-0.045	0.499254	-0.045	0.397463	-0.265	0.547052	-0.045
0.321176	-0.04	0.499777	-0.04	0.306453	-0.31	0.547421	-0.04
0.322225	-0.035	0.5	-0.035	0.318769	-0.305	0.54779	-0.035
0.323265	-0.03	0.5	-0.03	0.330586	-0.3	0.548157	-0.03
0.324294	-0.025	0.5	-0.025	0.212862	-0.35	0.548524	-0.025
0.325314	-0.02	0.5	-0.02	0.22632	-0.345	0.548889	-0.02
0.326324	-0.015	0.5	-0.015	0.239073	-0.34	0.549254	-0.015
0.327325	-0.01	0.5	-0.01	0.251174	-0.335	0.549617	-0.01
0.328316	-0.005	0.5	-0.005	0.26267	-0.33	0.54998	-0.005
0.329298	0	0.5	0	0.273605	-0.325	0.550341	0
0.301694	-0.11	0.458179	-0.2	0.284019	-0.32	0.519968	-0.2
0.304751	-0.105	0.460191	-0.195	0.293947	-0.315	0.521207	-0.195
0.307734	-0.1	0.462173	-0.19	0.120826	-0.375	0.522435	-0.19
0.253334	-0.2	0.464126	-0.185	0.141959	-0.37	0.523653	-0.185
0.256949	-0.195	0.466049	-0.18	0.161723	-0.365	0.524861	-0.18
0.260393	-0.19	0.467944	-0.175	0.180242	-0.36	0.526059	-0.175
0.263677	-0.185	0.46981	-0.17	0.197627	-0.355	0.527247	-0.17
0.266812	-0.18	0.47165	-0.165	0.0325097	-0.385	0.528426	-0.165
0.269806	-0.175	0.473463	-0.16	0.0943419	-0.38	0.529595	-0.16
0.272668	-0.17	0.47525	-0.155	0.42105	0.26	0.530755	-0.155
0.275407	-0.165	0.477011	-0.15	0.442703	0.255	0.531905	-0.15
0.27803	-0.16	0.478747	-0.145	0.463534	0.25	0.533046	-0.145
0.280543	-0.155	0.480459	-0.14	0.48359	0.245	0.534178	-0.14
0.282954	-0.15	0.482147	-0.135	0.330586	0.3	0.5353	-0.135
0.285268	-0.145	0.483811	-0.13	0.341612	0.295	0.536414	-0.13
0.287491	-0.14	0.485452	-0.125	0.352087	0.29	0.537519	-0.125
0.289627	-0.135	0.487071	-0.12	0.362051	0.285	0.538615	-0.12
0.291682	-0.13	0.488667	-0.115	0.371539	0.28	0.539703	-0.115
0.29366	-0.125	0.490242	-0.11	0.380585	0.275	0.540782	-0.11
0.295565	-0.12	0.491796	-0.105	0.389217	0.27	0.541853	-0.105
0.297401	-0.115	0.493328	-0.1	0.397463	0.265	0.542915	-0.1
0.299171	-0.11	0.400769	-0.285	0.306453	0.31	0.501386	-0.25
0.2	-0.255	0.40476	-0.28	0.318769	0.305	0.503344	-0.245
0.205162	-0.25	0.408661	-0.275	0.330586	0.3	0.505279	-0.24
0.211032	-0.245	0.412476	-0.27	0.212862	0.35	0.507191	-0.235
0.216626	-0.24	0.416207	-0.265	0.22632	0.345	0.50908	-0.23
0.221962	-0.235	0.419857	-0.26	0.239073	0.34	0.510948	-0.225
0.227057	-0.23	0.423429	-0.255	0.251174	0.335	0.512794	-0.22
0.231926	-0.225	0.426925	-0.25	0.26267	0.33	0.514618	-0.215
0.236582	-0.22	0.430348	-0.245	0.273605	0.325	0.516422	-0.21
0.24104	-0.215	0.433699	-0.24	0.284019	0.32	0.518205	-0.205
0.24531	-0.21	0.43698	-0.235	0.293947	0.315	0.519968	-0.2
0.249405	-0.205	0.440195	-0.23	0.120826	0.375	0.482565	-0.3
0.253334	-0.2	0.443345	-0.225	0.141959	0.37	0.484524	-0.295
0.114985	-0.3	0.446431	-0.22	0.161723	0.365	0.486451	-0.29
0.127215	-0.295	0.449455	-0.215	0.180242	0.36	0.488346	-0.285
0.138494	-0.29	0.452421	-0.21	0.197627	0.355	0.49021	-0.28
0.148914	-0.285	0.455328	-0.205	0.0325097	0.385	0.492043	-0.275
0.158559	-0.28	0.458179	-0.2	0.0943419	0.38	0.493848	-0.27
0.167502	-0.275	0.389765	-0.3	-0.42105	-0.26	0.495623	-0.265
0.17581	-0.27	0.393338	-0.295	-0.442703	-0.255	0.49737	-0.26
0.183544	-0.265	0.396802	-0.29	-0.463534	-0.25	0.49909	-0.255
0.190757	-0.26	0.300454	-0.39	-0.48359	-0.245	0.431947	-0.4
0.197495	-0.255	0.30684	-0.385	-0.330586	-0.3	0.434929	-0.395
0.107223	-0.305	0.313016	-0.38	-0.341612	-0.295	0.437856	-0.39
0.114985	-0.3	0.318992	-0.375	-0.352087	-0.29	0.440729	-0.385
1.66e-08	-0.335	0.324776	-0.37	-0.362051	-0.285	0.443551	-0.38
0.00701985	-0.33	0.330377	-0.365	-0.371539	-0.28	0.446322	-0.375
0.0305905	-0.325	0.335804	-0.36	-0.380585	-0.275	0.449043	-0.37
0.0531651	-0.32	0.341065	-0.355	-0.389217	-0.27	0.451717	-0.365
0.0748011	-0.315	0.346166	-0.35	-0.397463	-0.265	0.454343	-0.36
0.0955521	-0.31	0.351115	-0.345	-0.306453	-0.31	0.456923	-0.355
0.307734	0.1	0.355918	-0.34	-0.318769	-0.305	0.459458	-0.35
0.308917	0.095	0.360582	-0.335	-0.330586	-0.3	0.46195	-0.345
0.310089	0.09	0.365111	-0.33	-0.212862	-0.35	0.464398	-0.34
0.311248	0.085	0.369512	-0.325	-0.22632	-0.345	0.466805	-0.335
0.312396	0.08	0.37379	-0.32	-0.239073	-0.34	0.469171	-0.33
0.313532	0.075	0.377949	-0.315	-0.251174	-0.335	0.471498	-0.325
0.314656	0.07	0.381995	-0.31	-0.26267	-0.33	0.473785	-0.32
0.31577	0.065	0.385932	-0.305	-0.273605	-0.325	0.476035	-0.315
0.316872	0.06	0.389765	-0.3	-0.284019	-0.32	0.478248	-0.31
0.317964	0.055	0.285919	-0.4	-0.293947	-0.315	0.480424	-0.305
0.319045	0.05	0.293119	-0.395	-0.120826	-0.375	0.482565	-0.3
0.320116	0.045	0.206895	-0.455	-0.141959	-0.37	0.542915	0.1
0.321176	0.04	0.215235	-0.45	-0.161723	-0.365	0.543296	0.095
0.322225	0.035	0.223312	-0.445	-0.180242	-0.36	0.543677	0.09
0.323265	0.03	0.231138	-0.44	-0.197627	-0.355	0.544056	0.085
0.324294	0.025	0.238724	-0.435	-0.0325097	-0.385	0.544434	0.08
0.325314	0.02	0.246081	-0.43	-0.0943419	-0.38	0.544811	0.075
0.326324	0.015	0.253218	-0.425	-0.42105	0.26	0.545187	0.07
0.327325	0.01	0.260145	-0.42	-0.442703	0.255	0.545562	0.065
0.328316	0.005	0.26687	-0.415	-0.463534	0.25	0.545936	0.06
0.329298	0	0.273402	-0.41	-0.48359	0.245	0.546309	0.055
0.301694	0.11	0.279749	-0.405	-0.330586	0.3	0.546681	0.05
0.304751	0.105	0.285919	-0.4	-0.341612	0.295	0.547052	0.045
0.307734	0.1	0.114882	-0.49	-0.352087	0.29	0.547421	0.04
0.253334	0.2	0.129947	-0.485	-0.362051	0.285	0.54779	0.035
0.256949	0.195	0.144426	-0.48	-0.371539	0.28	0.548157	0.03
0.260393	0.19	0.158352	-0.475	-0.380585	0.275	0.548524	0.025
0.263677	0.185	0.171753	-0.47	-0.389217	0.27	0.548889	0.02
0.266812	0.18	0.184658	-0.465	-0.397463	0.265	0.549254	0.015
0.269806	0.175	0.197092	-0.46	-0.306453	0.31	0.549617	0.01
0.272668	0.17	0.0972195	-0.495	-0.318769	0.305	0.54998	0.005
0.275407	0.165	0.493328	0.1	-0.330586	0.3	0.550341	0
0.27803	0.16	0.493881	0.095	-0.212862	0.35	0.519968	0.2
0.280543	0.155	0.494431	0.09	-0.22632	0.345	0.521207	0.195
0.282954	0.15	0.494977	0.085	-0.239073	0.34	0.522435	0.19
0.285268	0.145	0.495521	0.08	-0.251174	0.335	0.523653	0.185
0.287491	0.14	0.496063	0.075	-0.26267	0.33	0.524861	0.18
0.289627	0.135	0.496601	0.07	-0.273605	0.325	0.526059	0.175
0.291682	0.13	0.497137	0.065	-0.284019	0.32	0.527247	0.17
0.29366	0.125	0.49767	0.06	-0.293947	0.315	0.528426	0.165
0.295565	0.12	0.498201	0.055	-0.120826	0.375	0.529595	0.16
0.297401	0.115	0.498729	0.05	-0.141959	0.37	0.530755	0.155
0.299171	0.11	0.499254	0.045	-0.161723	0.365	0.531905	0.15
0.2	0.255	0.499777	0.04	-0.180242	0.36	0.533046	0.145
0.205162	0.25	0.5	0.035	-0.197627	0.355	0.534178	0.14
0.211032	0.245	0.5	0.03	-0.0325097	0.385	0.5353	0.135
0.216626	0.24	0.5	0.025	-0.0943419	0.38	0.536414	0.13
0.221962	0.235	0.5	0.02			0.537519	0.125
0.227057	0.23	0.5	0.015			0.538615	0.12
0.231926	0.225	0.5	0.01			0.539703	0.115
0.236582	0.22	0.5	0.005			0.540782	0.11
0.24104	0.215	0.5	0			0.541853	0.105
0.24531	0.21	0.458179	0.2			0.542915	0.1
0.249405	0.205	0.460191	0.195			0.501386	0.25
0.253334	0.2	0.462173	0.19			0.503344	0.245
0.114985	0.3	0.464126	0.185			0.505279	0.24
0.127215	0.295	0.466049	0.18			0.507191	0.235
0.138494	0.29	0.467944	0.175			0.50908	0.23
0.148914	0.285	0.46981	0.17			0.510948	0.225
0.158559	0.28	0.47165	0.165			0.512794	0.22
0.167502	0.275	0.473463	0.16			0.514618	0.215
0.17581	0.27	0.47525	0.155			0.516422	0.21
0.183544	0.265	0.477011	0.15			0.518205	0.205
0.190757	0.26	0.478747	0.145			0.519968	0.2
0.197495	0.255	0.480459	0.14			0.482565	0.3
0.107223	0.305	0.482147	0.135			0.484524	0.295
0.114985	0.3	0.483811	0.13			0.486451	0.29
1.66e-08	0.335	0.485452	0.125			0.488346	0.285
0.00701985	0.33	0.487071	0.12			0.49021	0.28
0.0305905	0.325	0.488667	0.115			0.492043	0.275
0.0531651	0.32	0.490242	0.11			0.493848	0.27
0.0748011	0.315	0.491796	0.105			0.495623	0.265
0.0955521	0.31	0.493328	0.1			0.49737	0.26
-0.307734	-0.1	0.400769	0.285			0.49909	0.255
-0.308917	-0.095	0.40476	0.28			0.431947	0.4
-0.310089	-0.09	0.408661	0.275			0.434929	0.395
-0.311248	-0.085	0.412476	0.27			0.437856	0.39
-0.312396	-0.08	0.416207	0.265			0.440729	0.385
-0.313532	-0.075	0.419857	0.26			0.443551	0.38
-0.314656	-0.07	0.423429	0.255			0.446322	0.375
-0.31577	-0.065	0.426925	0.25			0.449043	0.37
-0.316872	-0.06	0.430348	0.245			0.451717	0.365
-0.317964	-0.055	0.433699	0.24			0.454343	0.36
-0.319045	-0.05	0.43698	0.235			0.456923	0.355
-0.320116	-0.045	0.440195	0.23			0.459458	0.35
-0.321176	-0.04	0.443345	0.225			0.46195	0.345
-0.322225	-0.035	0.446431	0.22			0.464398	0.34
-0.323265	-0.03	0.449455	0.215			0.466805	0.335
-0.324294	-0.025	0.452421	0.21			0.469171	0.33
-0.325314	-0.02	0.455328	0.205			0.471498	0.325
-0.326324	-0.015	0.458179	0.2			0.473785	0.32
-0.327325	-0.01	0.389765	0.3			0.476035	0.315
-0.328316	-0.005	0.393338	0.295			0.478248	0.31
-0.329298	0	0.396802	0.29			0.480424	0.305
-0.301694	-0.11	0.300454	0.39			0.482565	0.3
-0.304751	-0.105	0.30684	0.385			-0.542915	-0.1
-0.307734	-0.1	0.313016	0.38			-0.543296	-0.095
-0.253334	-0.2	0.318992	0.375			-0.543677	-0.09
-0.256949	-0.195	0.324776	0.37			-0.544056	-0.085
-0.260393	-0.19	0.330377	0.365			-0.544434	-0.08
-0.263677	-0.185	0.335804	0.36			-0.544811	-0.075
-0.266812	-0.18	0.341065	0.355			-0.545187	-0.07
-0.269806	-0.175	0.346166	0.35			-0.545562	-0.065
-0.272668	-0.17	0.351115	0.345			-0.545936	-0.06
-0.275407	-0.165	0.355918	0.34			-0.546309	-0.055
-0.27803	-0.16	0.360582	0.335			-0.546681	-0.05
-0.280543	-0.155	0.365111	0.33			-0.547052	-0.045
-0.282954	-0.15	0.369512	0.325			-0.547421	-0.04
-0.285268	-0.145	0.37379	0.32			-0.54779	-0.035
-0.287491	-0.14	0.377949	0.315			-0.548157	-0.03
-0.289627	-0.135	0.381995	0.31			-0.548524	-0.025
-0.291682	-0.13	0.385932	0.305			-0.548889	-0.02
-0.29366	-0.125	0.389765	0.3			-0.549254	-0.015
-0.295565	-0.12	0.285919	0.4			-0.549617	-0.01
-0.297401	-0.115	0.293119	0.395			-0.54998	-0.005
-0.299171	-0.11	0.206895	0.455			-0.550341	0
-0.2	-0.255	0.215235	0.45			-0.519968	-0.2
-0.205162	-0.25	0.223312	0.445			-0.521207	-0.195
-0.211032	-0.245	0.231138	0.44			-0.522435	-0.19
-0.216626	-0.24	0.238724	0.435			-0.523653	-0.185
-0.221962	-0.235	0.246081	0.43			-0.524861	-0.18
-0.227057	-0.23	0.253218	0.425			-0.526059	-0.175
-0.231926	-0.225	0.260145	0.42			-0.527247	-0.17
-0.236582	-0.22	0.26687	0.415			-0.528426	-0.165
-0.24104	-0.215	0.273402	0.41			-0.529595	-0.16
-0.24531	-0.21	0.279749	0.405			-0.530755	-0.155
-0.249405	-0.205	0.285919	0.4			-0.531905	-0.15
-0.253334	-0.2	0.114882	0.49			-0.533046	-0.145
-0.114985	-0.3	0.129947	0.485			-0.534178	-0.14
-0.127215	-0.295	0.144426	0.48			-0.5353	-0.135
-0.138494	-0.29	0.158352	0.475			-0.536414	-0.13
-0.148914	-0.285	0.171753	0.47			-0.537519	-0.125
-0.158559	-0.28	0.184658	0.465			-0.538615	-0.12
-0.167502	-0.275	0.197092	0.46			-0.539703	-0.115
-0.17581	-0.27	0.0972195	0.495			-0.540782	-0.11
-0.183544	-0.265	-0.493328	-0.1			-0.541853	-0.105
-0.190757	-0.26	-0.493881	-0.095			-0.542915	-0.1
-0.197495	-0.255	-0.494431	-0.09			-0.501386	-0.25
-0.107223	-0.305	-0.494977	-0.085			-0.503344	-0.245
-0.114985	-0.3	-0.495521	-0.08			-0.505279	-0.24
-1.66e-08	-0.335	-0.496063	-0.075			-0.507191	-0.235
-0.00701985	-0.33	-0.496601	-0.07			-0.50908	-0.23
-0.0305905	-0.325	-0.497137	-0.065			-0.510948	-0.225
-0.0531651	-0.32	-0.49767	-0.06			-0.512794	-0.22
-0.0748011	-0.315	-0.498201	-0.055			-0.514618	-0.215
-0.0955521	-0.31	-0.498729	-0.05			-0.516422	-0.21
-0.307734	0.1	-0.499254	-0.045			-0.518205	-0.205
-0.308917	0.095	-0.499777	-0.04			-0.519968	-0.2
-0.310089	0.09	-0.5	-0.035			-0.482565	-0.3
-0.311248	0.085	-0.5	-0.03			-0.484524	-0.295
-0.312396	0.08	-0.5	-0.025			-0.486451	-0.29
-0.313532	0.075	-0.5	-0.02			-0.488346	-0.285
-0.314656	0.07	-0.5	-0.015			-0.49021	-0.28
-0.31577	0.065	-0.5	-0.01			-0.492043	-0.275
-0.316872	0.06	-0.5	-0.005			-0.493848	-0.27
-0.317964	0.055	-0.5	0			-0.495623	-0.265
-0.319045	0.05	-0.458179	-0.2			-0.49737	-0.26
-0.320116	0.045	-0.460191	-0.195			-0.49909	-0.255
-0.321176	0.04	-0.462173	-0.19			-0.431947	-0.4
-0.322225	0.035	-0.464126	-0.185			-0.434929	-0.395
-0.323265	0.03	-0.466049	-0.18			-0.437856	-0.39
-0.324294	0.025	-0.467944	-0.175			-0.440729	-0.385
-0.325314	0.02	-0.46981	-0.17			-0.443551	-0.38
-0.326324	0.015	-0.47165	-0.165			-0.446322	-0.375
-0.327325	0.01	-0.473463	-0.16			-0.449043	-0.37
-0.328316	0.005	-0.47525	-0.155			-0.451717	-0.365
-0.329298	0	-0.477011	-0.15			-0.454343	-0.36
-0.301694	0.11	-0.478747	-0.145			-0.456923	-0.355
-0.304751	0.105	-0.480459	-0.14			-0.459458	-0.35
-0.307734	0.1	-0.482147	-0.135			-0.46195	-0.345
-0.253334	0.2	-0.483811	-0.13			-0.464398	-0.34
-0.256949	0.195	-0.485452	-0.125			-0.466805	-0.335
-0.260393	0.19	-0.487071	-0.12			-0.469171	-0.33
-0.263677	0.185	-0.488667	-0.115			-0.471498	-0.325
-0.266812	0.18	-0.490242	-0.11			-0.473785	-0.32
-0.269806	0.175	-0.491796	-0.105			-0.476035	-0.315
-0.272668	0.17	-0.493328	-0.1			-0.478248	-0.31
-0.275407	0.165	-0.400769	-0.285			-0.480424	-0.305
-0.27803	0.16	-0.40476	-0.28			-0.482565	-0.3
-0.280543	0.155	-0.408661	-0.275			-0.542915	0.1
-0.282954	0.15	-0.412476	-0.27			-0.543296	0.095
-0.285268	0.145	-0.416207	-0.265			-0.543677	0.09
-0.287491	0.14	-0.419857	-0.26			-0.544056	0.085
-0.289627	0.135	-0.423429	-0.255			-0.544434	0.08
-0.291682	0.13	-0.426925	-0.25			-0.544811	0.075
-0.29366	0.125	-0.430348	-0.245			-0.545187	0.07
-0.295565	0.12	-0.433699	-0.24			-0.545562	0.065
-0.297401	0.115	-0.43698	-0.235			-0.545936	0.06
-0.299171	0.11	-0.440195	-0.23			-0.546309	0.055
-0.2	0.255	-0.443345	-0.225			-0.546681	0.05
-0.205162	0.25	-0.446431	-0.22			-0.547052	0.045
-0.211032	0.245	-0.449455	-0.215			-0.547421	0.04
-0.216626	0.24	-0.452421	-0.21			-0.54779	0.035
-0.221962	0.235	-0.455328	-0.205			-0.548157	0.03
-0.227057	0.23	-0.458179	-0.2			-0.548524	0.025
-0.231926	0.225	-0.389765	-0.3			-0.548889	0.02
-0.236582	0.22	-0.393338	-0.295			-0.549254	0.015
-0.24104	0.215	-0.396802	-0.29			-0.549617	0.01
-0.24531	0.21	-0.300454	-0.39			-0.54998	0.005
-0.249405	0.205	-0.30684	-0.385			-0.550341	0
-0.253334	0.2	-0.313016	-0.38			-0.519968	0.2
-0.114985	0.3	-0.318992	-0.375			-0.521207	0.195
-0.127215	0.295	-0.324776	-0.37			-0.522435	0.19
-0.138494	0.29	-0.330377	-0.365			-0.523653	0.185
-0.148914	0.285	-0.335804	-0.36			-0.524861	0.18
-0.158559	0.28	-0.341065	-0.355			-0.526059	0.175
-0.167502	0.275	-0.346166	-0.35			-0.527247	0.17
-0.17581	0.27	-0.351115	-0.345			-0.528426	0.165
-0.183544	0.265	-0.355918	-0.34			-0.529595	0.16
-0.190757	0.26	-0.360582	-0.335			-0.530755	0.155
-0.197495	0.255	-0.365111	-0.33			-0.531905	0.15
-0.107223	0.305	-0.369512	-0.325			-0.533046	0.145
-0.114985	0.3	-0.37379	-0.32			-0.534178	0.14
-1.66e-08	0.335	-0.377949	-0.315			-0.5353	0.135
-0.00701985	0.33	-0.381995	-0.31			-0.536414	0.13
-0.0305905	0.325	-0.385932	-0.305			-0.537519	0.125
-0.0531651	0.32	-0.389765	-0.3			-0.538615	0.12
-0.0748011	0.315	-0.285919	-0.4			-0.539703	0.115
-0.0955521	0.31	-0.293119	-0.395			-0.540782	0.11
		-0.206895	-0.455			-0.541853	0.105
		-0.215235	-0.45			-0.542915	0.1
		-0.223312	-0.445			-0.501386	0.25
		-0.231138	-0.44			-0.503344	0.245
		-0.238724	-0.435			-0.505279	0.24
		-0.246081	-0.43			-0.507191	0.235
		-0.253218	-0.425			-0.50908	0.23
		-0.260145	-0.42			-0.510948	0.225
		-0.26687	-0.415			-0.512794	0.22
		-0.273402	-0.41			-0.514618	0.215
		-0.279749	-0.405			-0.516422	0.21
		-0.285919	-0.4			-0.518205	0.205
		-0.114882	-0.49			-0.519968	0.2
		-0.129947	-0.485			-0.482565	0.3
		-0.144426	-0.48			-0.484524	0.295
		-0.158352	-0.475			-0.486451	0.29
		-0.171753	-0.47			-0.488346	0.285
		-0.184658	-0.465			-0.49021	0.28
		-0.197092	-0.46			-0.492043	0.275
		-0.0972195	-0.495			-0.493848	0.27
		-0.493328	0.1			-0.495623	0.265
		-0.493881	0.095			-0.49737	0.26
		-0.494431	0.09			-0.49909	0.255
		-0.494977	0.085			-0.431947	0.4
		-0.495521	0.08			-0.434929	0.395
		-0.496063	0.075			-0.437856	0.39
		-0.496601	0.07			-0.440729	0.385
		-0.497137	0.065			-0.443551	0.38
		-0.49767	0.06			-0.446322	0.375
		-0.498201	0.055			-0.449043	0.37
		-0.498729	0.05			-0.451717	0.365
		-0.499254	0.045			-0.454343	0.36
		-0.499777	0.04			-0.456923	0.355
		-0.5	0.035			-0.459458	0.35
		-0.5	0.03			-0.46195	0.345
		-0.5	0.025			-0.464398	0.34
		-0.5	0.02			-0.466805	0.335
		-0.5	0.015			-0.469171	0.33
		-0.5	0.01			-0.471498	0.325
		-0.5	0.005			-0.473785	0.32
		-0.5	0			-0.476035	0.315
		-0.458179	0.2			-0.478248	0.31
		-0.460191	0.195			-0.480424	0.305
		-0.462173	0.19			-0.482565	0.3
		-0.464126	0.185
		-0.466049	0.18
		-0.467944	0.175
		-0.46981	0.17
		-0.47165	0.165
		-0.473463	0.16
		-0.47525	0.155
		-0.477011	0.15
		-0.478747	0.145
		-0.480459	0.14
		-0.482147	0.135
		-0.483811	0.13
		-0.485452	0.125
		-0.487071	0.12
		-0.488667	0.115
		-0.490242	0.11
		-0.491796	0.105
		-0.493328	0.1
		-0.400769	0.285
		-0.40476	0.28
		-0.408661	0.275
		-0.412476	0.27
		-0.416207	0.265
		-0.419857	0.26
		-0.423429	0.255
		-0.426925	0.25
		-0.430348	0.245
		-0.433699	0.24
		-0.43698	0.235
		-0.440195	0.23
		-0.443345	0.225
		-0.446431	0.22
		-0.449455	0.215
		-0.452421	0.21
		-0.455328	0.205
		-0.458179	0.2
		-0.389765	0.3
		-0.393338	0.295
		-0.396802	0.29
		-0.300454	0.39
		-0.30684	0.385
		-0.313016	0.38
		-0.318992	0.375
		-0.324776	0.37
		-0.330377	0.365
		-0.335804	0.36
		-0.341065	0.355
		-0.346166	0.35
		-0.351115	0.345
		-0.355918	0.34
		-0.360582	0.335
		-0.365111	0.33
		-0.369512	0.325
		-0.37379	0.32
		-0.377949	0.315
		-0.381995	0.31
		-0.385932	0.305
		-0.389765	0.3
		-0.285919	0.4
		-0.293119	0.395
		-0.206895	0.455
		-0.215235	0.45
		-0.223312	0.445
		-0.231138	0.44
		-0.238724	0.435
		-0.246081	0.43
		-0.253218	0.425
		-0.260145	0.42
		-0.26687	0.415
		-0.273402	0.41
		-0.279749	0.405
		-0.285919	0.4
		-0.114882	0.49
		-0.129947	0.485
		-0.144426	0.48
		-0.158352	0.475
		-0.171753	0.47
		-0.184658	0.465
		-0.197092	0.46
		-0.0972195	0.495
